1           **Heroin Cues Reveal Astroglial Heterogeneity in the Nucleus Accumbens Core**

2

3                                   Anna Kruyer<sup>1\*</sup> and Peter W. Kalivas<sup>1</sup>

4

5   <sup>1</sup> Department of Neuroscience, Medical University of South Carolina, Charleston, SC, USA.

6   \*Correspondence should be addressed to A.K. (173 Ashley Ave, MSC510, Charleston, SC,

7   29425; 843-876-2246, [kruyer@musc.edu](mailto:kruyer@musc.edu)).

8

9   **Running Title:** Heroin Cues Reveal Astroglial Heterogeneity

10   **Keywords:** astrocyte, GLT-1, heroin, nucleus accumbens core, synapse, self-administration

11

12   Abstract = 245 words

13   Text = 3982 words

14   5 Figures

15   1 Supplemental Figure

16   1 Supplemental Table

17 **ABSTRACT**

18 **BACKGROUND:** Cues predicting heroin delivery induce heroin seeking by initiating synaptic  
19 glutamate release in the nucleus accumbens core. The intensity of heroin seeking is negatively  
20 modulated by cue-induced increases in synaptic proximity of astrocytes. Glutamate-driven  
21 heroin seeking is also negatively regulated by compounds that promote glutamate uptake  
22 through the astrocytic transporter GLT-1. We hypothesized that the cue-induced increase in  
23 astrocyte synaptic proximity reduces heroin seeking by increasing GLT-1 synaptic proximity.

24 **METHODS:** Rats were trained to self-administer heroin or sucrose before undergoing extinction  
25 and cued reinstatement of heroin or sucrose seeking. We used confocal microscopy to assess  
26 expression and co-registration of GLT-1 with the synaptic marker Synapsin I in the nucleus  
27 accumbens core.

28 **RESULTS:** Extinction from heroin, but not sucrose self-administration, downregulated GLT-1.  
29 Heroin cues increased surface expression of GLT-1 in parallel with heroin seeking, but counter  
30 to expectations, the increase was not proximal to synapses identified by Synapsin I. In fact,  
31 astroglia showing cue-induced increased surface expression of GLT-1 constituted a distinct  
32 subpopulation of astroglia from those showing increased synaptic proximity. Supporting discrete  
33 mechanisms, preventing cue-evoked increases in astrocyte synaptic proximity by knocking  
34 down the astroglial-selective actin binding protein ezrin did not impact cue-induced increases in  
35 GLT-1 surface expression.

36 **CONCLUSIONS:** Our data demonstrate that heroin-paired cues elicit two transient adaptations  
37 in astrocytes in the nucleus accumbens core, restoration of synaptic proximity and increased  
38 surface expression of GLT-1. Each adaptation occurs in largely non-overlapping subpopulations  
39 of astrocytes, but both adaptations appear to dampen reinstated heroin seeking.

## 40 INTRODUCTION

41 Relapse to heroin use remains a leading cause of death in the United States. Decades of  
42 research demonstrate the importance of glutamate dysregulation in the nucleus accumbens  
43 core (NAcore) as a causative factor in relapse-like behavior in animal models<sup>1</sup>. Glutamate  
44 dysregulation results from chronic use of addictive drugs due in large part to changes in NAcore  
45 astroglia that express the glutamate transporter GLT-1 and conduct the bulk of glutamate  
46 uptake in brain<sup>2,3</sup>. Addictive substances, including alcohol, nicotine, psychostimulants, and  
47 opioids produce an enduring downregulation of GLT-1 on astrocytes in the NAcore<sup>4</sup>.  
48 Furthermore, astroglial processes that normally ensheath synapses and take up glutamate  
49 during synaptic transmission retract from NAcore synapses after withdrawal from cocaine,  
50 heroin, and methamphetamine, but not after sucrose self-administration and extinction<sup>5-7</sup>.  
51 Synaptic retraction of astroglial processes and downregulation of GLT-1 disrupt glutamate  
52 homeostasis, permitting spillover of synaptic glutamate and postsynaptic potentiation during  
53 seeking triggered by drug-, but not sucrose-associated cues<sup>8</sup>.

54 We previously found that synaptic retraction of NAcore astroglia after heroin withdrawal is  
55 partially reversed during cue-induced heroin seeking and the transient restoration of synaptic  
56 proximity by NAcore astrocytes reduces the intensity of heroin seeking<sup>6</sup>. We hypothesized that  
57 the suppression of cued heroin seeking by astrocyte morphological plasticity results from  
58 enhanced synaptic proximity of GLT-1 on perisynaptic astroglial processes, serving to attenuate  
59 the spillover of synaptic glutamate that mediates cue-induced drug seeking. We examined  
60 synaptic proximity of GLT-1 by measuring co-registration of immuno-labeled GLT-1 with the  
61 presynaptic marker Synapsin I after 15- or 120-min of cue-reinstated heroin seeking. We found  
62 that GLT-1 expression in NAcore astrocytes and co-registration of GLT-1 with Synapsin I were  
63 both decreased after extinction from heroin self-administration. Although heroin cues did not  
64 alter GLT-1 levels in NAcore astroglia, the proportion of total GLT-1 on the astroglial surface  
65 transiently increased. Although heroin cues simultaneously increased synaptic proximity of

66 NAc core astroglia and GLT-1 surface expression, we found no increase in co-registration of GLT-  
67 1 with Synapsin I after 15-min of cued reinstatement. Moreover, astroglia with high heroin cue-  
68 induced surface expression of GLT-1 were not those demonstrating cue-induced increases in  
69 synaptic proximity. These findings indicate the presence of two discrete subpopulations of  
70 NAc core astroglia undergoing molecularly dissociable mechanisms of cue-induced plasticity that  
71 both decrease heroin seeking.

## 72 **METHODS**

### 73 Self-administration

74 Experimental procedures involving animals were conducted in accordance with guidelines  
75 established by the Institutional Animal Care and Use Committee at the Medical University of  
76 South Carolina. Operant training was conducted as previously described<sup>6</sup>. Briefly, male Sprague  
77 Dawley rats (200-250g) were anesthetized with i.m. ketamine (100 mg/kg) and xylazine (7  
78 mg/kg) and fitted with intrajugular catheters. Rats were trained to self-administer heroin during  
79 3h sessions for 10d and presses on an active lever were paired with light and tone cues and i.v.  
80 heroin infusion. Animals trained to self-administer sucrose did not undergo catheter implantation  
81 and received sucrose (45 mg, Bio-Serv) in place of heroin along with cues during self-  
82 administration. Yoked controls were played cues when a paired rat received heroin or sucrose.  
83 Rats yoked to heroin self-administering animals also received i.v. saline infusions. After self-  
84 administration, animals underwent 10-12d of extinction training (3h/d) where active lever  
85 presses yielded no reward or cues. Extinguished rats and yoked controls were sacrificed 24h  
86 after the final extinction session. Reinstated animals were placed in the operant chamber for 15  
87 or 120m 24h after the last extinction session and cues were restored to the active lever, but no  
88 reward was delivered.

89

### 90 Viral labeling

91 After catheter implantation or 5d before starting sucrose self-administration, rats received  
92 microinjections (1  $\mu$ L/hemisphere, 0.15  $\mu$ L/minute, 5 min diffusion) of a virus driving expression  
93 of membrane-targeted mCherry under control of the GFAP promoter (AAV5/GFAP-hM3dq-  
94 mCherry, University of Zurich) in the NAcCore (+1.5mm AP,  $\pm$ 1.8mm ML, -7.0mm DV). Virus  
95 incubation occurred over the course of operant training (~4 wks).

96

### 97 Confocal imaging and image analysis

98 Animals were anesthetized with an overdose of pentobarbital (20 mg i.v. or 100 mg i.p.) and  
99 perfused transcardially with 4% PFA. Brains were incubated overnight in 4% PFA and sliced at  
100 100  $\mu\text{m}$  using a vibratome (Thermo Fisher). Slices containing the NAcore were permeabilized in  
101 PBS with 2% Triton X-100 for 1h at room temperature. Non-specific epitope binding was  
102 blocked by blocking in PBS with 0.2% Triton X-100 (PBST) and 2% NGS for 1h at room  
103 temperature before incubation in primary antibodies (1:1000; rabbit anti-Synapsin I, ab64581  
104 and guinea pig anti-GLT-1, ab1783) for 48h in block. After washing in PBST, tissue was  
105 incubated overnight in biotinylated anti-guinea pig antibody (1:1000, BA-7000) in PBST and  
106 then overnight in fluorescently-labeled antibodies (1:1000, 488-streptavidin and 647-anti-rabbit,  
107 Thermo Fisher) in PBST. Tissue was washed in PBST and mounted onto glass slides before  
108 imaging with a Leica SP5 laser scanning confocal microscope. All images were acquired at 63x  
109 using an oil immersion objective lens, 1024 x 1024 frame size, 12-bit resolution, 4-frame  
110 averaging and a 1- $\mu\text{m}$  step size. Z-stacks were iteratively deconvolved 10 times (Autoquant)  
111 and digital analysis of mCherry signal intensity relative to background was used to generate a  
112 digital model of each astrocyte (Bitplane Imaris). Rendered astrocytes were used to mask GLT-  
113 1 and Synapsin I signal that was not co-registered with the astroglial volume. Co-registration  
114 (astrocyte with Synapsin I, astrocyte with GLT-1, GLT-1 with Synapsin I) was determined based  
115 on thresholded signal intensity in each channel. Voxels containing signal intensity greater than  
116 noise in each channel were determined empirically using the colocalization module and were  
117 used to build a colocalization channel. The surface module was used to determine the net  
118 volume of co-registered signal. Synapsin and GLT-1 co-registration were normalized to the  
119 volume of the astrocyte from which they were generated. Surface-proximal GLT-1 was  
120 determined by excluding co-registered signal that was within the astrocyte volume, but >250nm  
121 from the membrane and was normalized to total GLT-1 from the same astroglial volume.  
122 Imaging and analyses were conducted blind to animal treatment.

123

124 Ezrin knockdown

125 After catheter placement, animals were fitted with bilateral cannulae above the NAcCore (+1.5mm  
126 AP,  $\pm$ 1.8mm ML, -5.5mm DV). Starting on day 6 of extinction training, animals received  
127 infusions of an ezrin antisense or control oligo 1.5mm beyond the base of the guide cannulae  
128 (1 $\mu$ L per hemisphere, 0.5 $\mu$ L/min) for 3 consecutive days, according to<sup>6</sup>. After 3 additional days  
129 of extinction training, rats underwent cued reinstatement for 15-min prior to sacrifice.

130

131 Statistics

132 Data were analyzed using GraphPad Prism 7 and a D'Agostino-Pearson normality test followed  
133 by Kruskal-Wallis or Mann-Whitney tests when one or more groups were not normally  
134 distributed. Dunn's test was used for post hoc comparisons. Normally distributed data were  
135 analyzed using a 1- or 2-way ANOVA or a Student's t-test. Cumulative distributions were  
136 analyzed using Kolmogorov-Smirnov or Chi<sup>2</sup>. A Pearson's coefficient was calculated for all  
137 correlations. In all cases,  $p < 0.05$  was considered significant.

## 138 RESULTS

### 139 Heroin self-administration constitutively reduced synaptic co-registration of GLT-1

140 In order to examine whether enhanced synaptic proximity of NAc core astroglia suppressed cue-  
141 induced heroin seeking through changes in synaptic proximity of GLT-1, NAc core astroglia were  
142 labeled with a membrane-bound fluorescent reporter prior to operant training. Rats were trained  
143 to self-administer heroin or sucrose and reward delivery was paired with light and tone cues (Fig  
144 S1A). Operant responding was extinguished and a portion of rats were reinstated by restoring  
145 conditioned cues to active lever pressing for 15 or 120 min (Fig S1B). Animals that received  
146 yoked saline delivery and cues served as controls for heroin-trained rats and animals that  
147 received yoked cues were controls for sucrose-trained rats. Some animals used to generate the  
148 data herein were included in a previous study<sup>6</sup>, and mCherry transfected astrocytes from these  
149 animals were double-labeled for GLT-1 for further quantification in this report. New rats were  
150 also generated and Table S1 outlines the numbers of rats and cells that were used previously  
151 and herein co-labeled for GLT-1 or that were newly generated. NAc core slices from each  
152 treatment group (yoked, extinguished, 15-min reinstated, 120-min reinstated) were labeled for  
153 GLT-1 and the presynaptic marker Synapsin I and imaged using confocal microscopy (Fig 1).  
154 Total GLT-1 and co-registered GLT-1 and Synapsin I were quantified and individually  
155 normalized to the volume of each mCherry-labeled astrocyte. To estimate the proportion of  
156 surface-proximal GLT-1, we digitally isolated GLT-1 within 250 nm of the astroglial membrane  
157 and normalized this measure to total levels of GLT-1 from each astrocyte (Fig 1).

158 As previously reported<sup>6</sup>, co-registration of the astroglial membrane with Synapsin I was reduced  
159 after withdrawal from heroin, but not sucrose (Fig S1C). We also found reductions in total  
160 astrocyte GLT-1 expression after extinction from heroin (Fig 2A), but not sucrose self-  
161 administration (Fig 2B), consistent with previous reports that heroin withdrawal is associated  
162 with reduced tissue levels of GLT-1 protein and glutamate uptake in the NAc core<sup>9,10</sup>. Although  
163 total GLT-1 was reduced in heroin extinguished rats, the proportion of surface-proximal GLT-1



164 was unaltered (Fig 2C, E). Surprisingly, the ratio of surface to total GLT-1 was reduced in the  
165 NAcore of rats extinguished from sucrose (Fig 2D). Synapsin I was not altered after extinction  
166 from heroin or sucrose<sup>6</sup>. However, consistent with a reduction in total GLT-1, the co-registration  
167 of GLT-1 and Synapsin I was reduced after extinction from heroin self-administration (Fig 2G),  
168 but not sucrose self-administration (Fig 2H).

169

### 170 **GLT-1 surface expression was transiently elevated during cued heroin seeking.**

171 Fifteen min of cued heroin reinstatement increased the co-registration of astroglia with Synapsin  
172 I (Fig S1C). In contrast, after 15 or 120 min of cued heroin reinstatement, total GLT-1 and GLT-  
173 1 co-registration with Synapsin I remained reduced to the same levels produced after heroin  
174 extinction (Fig 2A,G). However, compared to yoked saline and extinguished rats, surface-  
175 proximal GLT-1 was elevated during 15-min of cued heroin seeking and returned to extinction  
176 levels after 120-min of cue exposure (Fig 2C). The reinstatement-induced increase in surface  
177 proximal GLT-1 is shown by a shift in the proportion of astroglia having low surface GLT-1 and  
178 an increase in proportion of astroglia with higher levels of GLT-1 (Fig 2E). In contrast, although  
179 the proportion of surface-proximal GLT-1 was reduced after extinction in sucrose-trained rats  
180 (Fig 2D), reinstated sucrose seeking did not further alter surface proximal GLT-1 (Fig 2D, F).

181

### 182 **Astrocyte heterogeneity in heroin cue-induced plasticity.**

183 The fact that astroglial synaptic proximity was transiently induced by 15 min of cued heroin  
184 reinstatement, but the increase in surface proximal GLT-1 did not co-register with Synapsin I  
185 indicates two types of heroin cue-induced astroglial plasticity that may not co-exist in the same  
186 astrocytes. In order to more closely examine characteristics of astrocytes with high synaptic  
187 proximity, we used the median values of astrocyte co-registration with Synapsin I and GLT-1  
188 surface proximity from yoked saline rats to separate astrocytes with high and low levels of each  
189 cellular trait. Astrocytes with low (<1.18% astrocyte volume) and high degrees of synaptic

190 proximity (>1.18% astrocyte volume) exhibited similar levels of surface-proximal GLT-1 in yoked  
191 saline rats (Fig 3A). When astrocytes from 15-min reinstated rats were subdivided using the  
192 same values described for saline-treated rats, we observed different surface GLT-1 expression  
193 in the two subpopulations. Astrocytes with a high degree of synaptic co-registration had lower  
194 levels of surface GLT-1, and vice versa (Fig 3B-C).

195

### 196 **Astroglial subtypes are evenly distributed in yoked saline, but not heroin-trained rats**

197 To better characterize the distribution of astroglial subpopulations in yoked saline and heroin-  
198 trained rats, we applied the same median split strategy to create 4 subcategories of astroglia  
199 (High or Low Synapsin I co-registration at 1.18% astroglial volume and High or Low Surface  
200 GLT-1 at 5.11% total GLT-1). Stratifying astrocytes into subpopulations according to distribution  
201 of these two markers produced nearly equal populations in yoked saline rats (Fig 3D). We  
202 subdivided astrocytes from heroin-trained rats in the same manner and found that synaptic  
203 retraction by astroglia (Fig S1C) reduced the proportion of subpopulations characterized by high  
204 Synapsin I co-registration in heroin extinguished rats and after 120-min of cued heroin seeking  
205 (Fig 3D). Conversely, morphological plasticity after 15-min of active heroin seeking expanded  
206 the subpopulations with a high degree of synaptic proximity.

207 While synaptic proximity and surface expression of GLT-1 were positively correlated in astroglia  
208 from yoked saline rats (Fig 3E), these measures were negatively correlated after 15-min of cued  
209 heroin seeking, consistent with the finding that astrocytes undergoing morphological plasticity  
210 during heroin seeking did not exhibit a high degree of surface GLT-1 (Fig 3G). No correlation  
211 was found between these measures during extinction (Fig 3F). There was a trending negative  
212 correlation between surface GLT-1 in those astroglia designated as “high” (>5.11% total) and  
213 active lever pressing during 15-min of cued reinstatement (Fig 3H).

214

215 **Abolishing morphological plasticity during cued reinstatement did not impact surface**  
216 **expression of GLT-1**

217 To determine whether surface expression of GLT-1 remained elevated when astrocyte  
218 morphological plasticity was inhibited during cued seeking, we knocked down ezrin expression  
219 prior to reinstatement. Ezrin links actin with the cell membrane in astroglial peripheral  
220 processes<sup>11,12</sup>, and ezrin knockdown using an antisense morpholino oligo reduces synaptic  
221 proximity of astroglia in the NAc<sup>6</sup>.

222 We trained rats to self-administer heroin and during extinction, an ezrin antisense oligomer was  
223 infused into the NAc for 3 consecutive days (Fig 4A). We previously showed that this  
224 regimen of ezrin antisense oligo infusion knocks down ezrin in NAc astroglia compared with  
225 a control oligo by 86% (N=19-24/6 cells/animal/group)<sup>6</sup>. Rats were reinstated for 15 minutes  
226 using heroin cues and ezrin knockdown increased active lever pressing (Fig 4B), as observed  
227 previously<sup>6</sup>. We quantified Synapsin I co-registration with NAc astroglia and GLT-1  
228 expression as described above. As expected after ezrin knockdown, Synapsin I co-registration  
229 with astrocytes was reduced (Fig 4C). We found no change in total GLT-1 expression after ezrin  
230 knockdown (Fig 4D), and a reduction in synaptic co-registration of GLT-1 (Fig 4E), likely the  
231 result of the synaptic retraction of astroglial processes produced by ezrin knockdown.  
232 Importantly, we found no impact of ezrin knockdown on the proportion of surface-proximal GLT-  
233 1 (Fig 4F), demonstrating that astroglial peripheral process extension is not required for surface  
234 diffusion of GLT-1.

235 Comparing synaptic co-registration and surface GLT-1 in NAc astrocytes from rats that  
236 received the control oligo revealed a similar distribution as observed during 15-min of cued  
237 reinstatement (compare Fig 4G, I and Fig 3G, D). By reducing astrocyte co-registration with  
238 Synapsin I, ezrin knockdown abolished subpopulations characterized by high synaptic co-  
239 registration in all treatment groups (Fig 4H, I), resulting in a subpopulation distribution of  
240 astrocytes similar to heroin extinguished rats (see Fig 3D). Based on these results, we conclude

241 that heroin-associated changes in surface expression of GLT-1 on NAcore astroglia is  
242 mechanistically distinct from changes in astrocyte morphological plasticity and the two cue-  
243 induced adaptations occur in separate populations of NAcore astroglia.

244 **DISCUSSION**

245 NAc core astrocytes exhibit dynamic plasticity in synaptic proximity in response to heroin cues,  
246 and their increase in synaptic proximity dampens reinstated heroin seeking<sup>6</sup>. One mechanism  
247 whereby perisynaptic astroglia may reduce heroin seeking is by decreasing cue-induced  
248 synaptic glutamate spillover through synaptic localization of the astroglial glutamate transporter  
249 GLT-1<sup>13,14</sup>. Commensurate with this possibility, we found that the proportion of surface GLT-1  
250 was elevated on NAc core astrocytes during cue-induced reinstatement of heroin seeking.  
251 However, the increase in surface GLT-1 during seeking did not give rise to increased co-  
252 registration of GLT-1 with Synapsin I. Instead, the transient increase in synaptic proximity by  
253 astroglia and the transient elevation in surface proximity of GLT-1 occurred in different  
254 subpopulations of NAc core astroglia, with only a small proportion of astrocytes in reinstated rats  
255 exhibiting both phenotypes. Importantly, either pharmacologically increasing GLT-1<sup>9,15,16</sup> or cue-  
256 induced increases in astroglial proximity to NAc core synapses<sup>6</sup> dampen cued heroin  
257 reinstatement. Thus, although our data reveal that NAc core astrocytes are equipped with two  
258 discrete and molecularly separable mechanisms of heroin cue-induced plasticity, both  
259 mechanisms serve a homeostatic function to dampen cue-induced relapse. How we expect that  
260 these mechanisms can decrease cued heroin seeking is described in detail below.

261

262 **Synaptic glutamate spillover and cue-induced heroin reinstatement are reduced by two**  
263 **distinct forms of cue-induced astroglial plasticity**

264 Reinstated seeking sustained by heroin-paired cues is associated with synaptic glutamate  
265 spillover that originates from prefrontal cortical synapses in the NAc core<sup>17</sup>. Glutamate spillover  
266 arises in large part from the downregulation of GLT-1 after the use of heroin and other addictive  
267 substances<sup>18</sup>. Importantly, synaptic glutamate spillover does not occur during cued sucrose  
268 seeking<sup>18</sup> because, in contrast to heroin or psychostimulants, the proximity of astroglia to  
269 NAc core synapses and the perisynaptic expression of GLT-1 are not reduced following sucrose

270 self-administration (Fig 5). Cue-induced spillover interacts with extrasynaptic glutamate  
271 receptors in at least two ways to promote motivated heroin seeking. The first is through access  
272 to extrasynaptic NMDA receptors containing the GluN2b subunit (NR2B) located on the  
273 postsynaptic annulus. NR2B density in the NAc core is elevated after heroin withdrawal and  
274 NR2B stimulation is increased by synaptic spillover after heroin self-administration<sup>9</sup>. Moreover,  
275 preventing NR2B stimulation inhibits heroin-induced seeking and synaptic potentiation<sup>9</sup>. A  
276 second mechanism by which synaptic glutamate spillover promotes heroin seeking is via  
277 diffusion of glutamate to metabotropic glutamate receptor-5 (mGluR5) located on the subclass  
278 of NAc core interneurons expressing neuronal nitric oxide synthase (nNOS). The ensuing  
279 production of nitric oxide (NO) promotes matrix metalloprotease activation and stimulation of  $\beta$ 3-  
280 integrin receptors in the postsynapse to initiate transient synaptic potentiation (t-SP) and  
281 increase drug seeking<sup>19-21</sup>. To suppress t-SP and motivated heroin seeking, astroglia undergo  
282 two adaptations that reduce the impact of synaptic glutamate spillover (Fig 5), and as shown  
283 here, these adaptations occur largely in distinct populations of astroglia. For discussion  
284 purposes, we will refer to these two populations below as Type I (cued increase in synaptic  
285 proximity) and Type II (cued increase in surface GLT-1). Not only did we find that Type I and  
286 Type II adaptations occur in different cell types, but preventing Type I by knocking down ezrin  
287 did not alter the cue-induced induction of Type II.

288  
289 **Type I Astroglia: Cue-induced morphological plasticity with no increase in surface GLT-1**

290 A portion of mature synapses throughout the brain are insulated by astroglia<sup>22</sup>, and the  
291 perisynaptic astroglial membrane expresses the highest density of GLT-1 and other proteins,  
292 such as glutamate receptors and actin binding proteins, that permit astroglial plasticity in  
293 response to synaptic neurotransmission in order to maintain synaptic glutamate  
294 homeostasis<sup>13,22,23</sup>. At least in the hippocampus, the astroglial sheath is biased toward the  
295 postsynapse<sup>24</sup>, thereby permitting access of synaptically released glutamate to presynaptic

296 mGluR2/3, autoreceptors that regulate release probability<sup>25</sup>. Withdrawal from addictive drugs,  
297 including heroin, cocaine, or methamphetamine is associated with an enduring retreat of  
298 astroglia from synapses in the NAcore<sup>5-7</sup>, and the presentation of heroin-paired cues promotes  
299 transient synaptic re-association in Type I astroglia (Fig 5). Although surface GLT-1 is not  
300 altered by heroin cues in Type I astroglia, the synaptic re-association may limit access of  
301 synaptic glutamate to perisynaptic NR2B and thereby dampen t-SP and heroin seeking. In  
302 support of this idea, blocking the cue-induced re-association of astrocytes with NAcore  
303 synapses by application of an ezrin-targeted antisense oligomer promotes cued-heroin  
304 seeking<sup>6</sup>. While inhibiting diffusion of synaptic glutamate to NR2B on the postsynaptic annulus  
305 is one hypothesis for how synaptic re-association by Type I astroglia could dampen heroin  
306 seeking, lack of coincident upregulated surface GLT-1 may permit glutamate spillover to diffuse  
307 to more distant sites critical for cued reinstatement, such as mGluR5 on nNOS interneurons.

308

309 **Type II Astroglia: Cue-induced increases in surface GLT-1 with no change in synaptic**  
310 **proximity**

311 A portion of astroglia responded to cue-induced glutamate spillover by increasing surface GLT-  
312 1, but this increase did not co-register with Synapsin I, indicating that surface GLT-1 in  
313 reinstated animals is distant from the synapse. Type II astroglia permit glutamate spillover to  
314 access glutamate receptors near the pre and postsynaptic annulus to reduce glutamate release  
315 probability (presynaptic mGluR2/3) and promote t-SP (postsynaptic NR2B). However, diffusion  
316 of glutamate to more distal sites would be reduced by increased surface GLT-1<sup>9</sup>. Notably, by  
317 inhibiting glutamate access to nNOS interneurons and the consequent mGluR5-mediated  
318 increase in NO, extrasynaptic GLT-1 could dampen t-SP and cued heroin seeking<sup>19</sup>. Indeed,  
319 pharmacologically upregulating GLT-1 with drugs such as ceftriaxone not only inhibits access of  
320 synaptic glutamate to heroin-upregulated NR2B, but reduces both t-SP and cue-induced drug  
321 seeking<sup>26-28</sup>.

322 Potential non-neuronal sources of extracellular glutamate may also be subject to regulation  
323 through increased surface GLT-1, including calcium-dependent release from astroglia<sup>29,30</sup> and  
324 glutamate extruded by the cystine-glutamate antiporter in exchange for cystine uptake, an  
325 essential amino acid needed for glutathione synthesis and regulation of cellular redox status<sup>31</sup>.  
326 These sources do not appear to contribute directly to cued increases in glutamate transmission  
327 since inhibiting prefrontal cortical inputs to the NAc core is sufficient to abolish cue-dependent  
328 increases in extracellular glutamate<sup>18</sup>. Instead, stimulating calcium-dependent astroglial  
329 glutamate release by increasing intracellular calcium selectively in NAc core astroglia or  
330 stimulating the cystine-glutamate antiporter with N-acetylcysteine decreases reinstated drug  
331 seeking by activating mGluR2/3<sup>30-32</sup>, arguing that reducing these nonsynaptic contributions to  
332 extracellular glutamate are not consequential to how we hypothesize increasing GLT-1 inhibits  
333 heroin seeking. Another interesting source of extracellular glutamate is activation of astroglial  
334 glutamate release by stimulating mu opioid receptors<sup>33</sup>. It is possible that the presumed  
335 elevation in astroglial glutamate release produced by mu opioid receptor stimulation during  
336 heroin self-administration could induce some of the enduring synaptic and astroglial adaptations  
337 seen after heroin withdrawal in the NAc core. This possibility is supported by the fact that mu  
338 receptor mediated release of astroglial glutamate stimulates NR2B located on the postsynaptic  
339 annulus.

340

### 341 **Two distinct forms of astroglial plasticity to negatively regulate heroin seeking**

342 It is unclear what contingencies in individual astroglia lead to cue-induced deployment of one or  
343 the other mechanism of astroglial plasticity described here. However, having two distinct  
344 subpopulations of cue-induced astroglial plasticity poses the intriguing possibility that the  
345 astroglial subpopulations may be differentially associated with the two principle cell types in the  
346 NAc core, D1- and D2-receptor expressing medium spiny neurons (D1- and D2-MSNs)<sup>34</sup>.  
347 Supporting this possibility, astrocytes in the dorsal striatum are selectively tuned to one or the



348 other neuronal subtype, responding with calcium flux during electrophysiological stimulation of  
349 either D1- or D2-MSNs, but not both<sup>35</sup>. If the increase in surface GLT-1 and astrocyte synaptic  
350 proximity also segregate across D1- and D2-MSNs, the two distinct forms of astroglial plasticity  
351 have the potential to utilize the opponent behavioral outputs from D1- and D2-MSNs to dampen  
352 cued heroin seeking. Thus, one process could reduce the capacity of D1-MSNs to promote  
353 cued drug seeking, and the other augment D2-MSN suppression of drug seeking<sup>36,37</sup>.

354

### 355 **Astroglial plasticity during sucrose versus heroin seeking**

356 The data shown here provide insight into unique astroglial adaptations that follow from operant  
357 training with sucrose versus heroin. While intake of the two reinforcers is quite different, with  
358 rats pressing significantly more for sucrose than for heroin (Fig S1A), sucrose did not down-  
359 regulate GLT-1 and does not produce changes in synaptic proximity by NAc core astroglia<sup>6,10</sup>.  
360 Interestingly, although we found no changes in co-registration of GLT-1 with Synapsin I in  
361 sucrose-trained or reinstated animals, we observed a reduction in surface expression of GLT-1  
362 after extinction from sucrose self-administration compared to yoked controls. The marked  
363 reductions in synaptic insulation and GLT-1 expression by NAc core astroglia after heroin  
364 extinction compared with the modest reduction in GLT-1 surface expression after sucrose  
365 extinction may contribute to the more perseverative extinction responding after exposure to  
366 addictive drugs compared with natural rewards (see Fig S1A and <sup>38</sup>). Alternatively, the unique  
367 constitutive adaptations after sucrose versus heroin use may permit the dramatic astroglial  
368 morphological plasticity and increases in surface GLT-1 produced by heroin- but not sucrose-  
369 paired cues.

370

### 371 **Conclusions and clinical implications**

372 We found that astroglia in the NAc core exhibit heterogeneous forms of plasticity capable of  
373 shaping cue-induced heroin seeking. Moreover, both astroglial morphological plasticity and

374 GLT-1 surface expression are transient events that involve proteins selectively expressed in  
375 astroglia (e.g. ezrin and GLT-1), providing potential routes for experimental manipulation and  
376 perhaps selective therapeutic interventions into one or the other process. Indeed,  
377 pharmacological treatments such as ceftriaxone and N-acetylcysteine that elevate GLT-1 are  
378 effective at reducing drug seeking in rodent models of relapse<sup>15,39,40</sup>. While ceftriaxone also  
379 restores synaptic insulation by astroglia in preclinical studies using cocaine<sup>5</sup>, this has not been  
380 evaluated for N-acetylcysteine, which has proven only marginally effective at reducing relapse in  
381 human trials<sup>41-43</sup>. Given that astroglia engage two distinct processes for dampening cue-induced  
382 drug seeking, the underwhelming efficacy in relapse prevention by drugs restoring GLT-1 might  
383 be improved in combination with drugs that promote synaptic proximity by NAc core astroglia.

384 **ACKNOWLEDGEMENTS**

385 We thank members of the Kalivas lab for their thoughtful input, especially Dr. Daniela Neuhofer.

386 This work was supported by the National Institutes of Health (DA007288 and DA044782, AK:

387 DA003906 and DA012513, PWK) and the National Science Foundation (OIA 1539034, PWK).

388 **DISCLOSURES**

389 The authors declare no competing financial interests.

390 REFERENCES

- 391 1 Kalivas, P. W. The glutamate homeostasis hypothesis of addiction. *Nat Rev Neurosci*  
392 **10**, 561-572, doi:10.1038/nrn2515 (2009).
- 393 2 Lehre, K. P. & Danbolt, N. C. The number of glutamate transporter subtype molecules at  
394 glutamatergic synapses: chemical and stereological quantification in young adult rat  
395 brain. *J Neurosci* **18**, 8751-8757 (1998).
- 396 3 Danbolt, N. C. Glutamate uptake. *Prog Neurobiol* **65**, 1-105 (2001).
- 397 4 Roberts-Wolfe, D. J. & Kalivas, P. W. Glutamate Transporter GLT-1 as a Therapeutic  
398 Target for Substance Use Disorders. *CNS Neurol Disord Drug Targets* **14**, 745-756  
399 (2015).
- 400 5 Scofield, M. D. *et al.* Cocaine Self-Administration and Extinction Leads to Reduced Glial  
401 Fibrillary Acidic Protein Expression and Morphometric Features of Astrocytes in the  
402 Nucleus Accumbens Core. *Biol Psychiatry* **80**, 207-215,  
403 doi:10.1016/j.biopsych.2015.12.022 (2016).
- 404 6 Kruyer, A., Scofield, M. D., Wood, D., Reissner, K. J. & Kalivas, P. W. Heroin Cue-  
405 Evoked Astrocytic Structural Plasticity at Nucleus Accumbens Synapses Inhibits Heroin  
406 Seeking. *Biol Psychiatry*, doi:10.1016/j.biopsych.2019.06.026 (2019).
- 407 7 Siemsen, B. M. *et al.* Effects of Methamphetamine Self-Administration and Extinction on  
408 Astrocyte Structure and Function in the Nucleus Accumbens Core. *Neuroscience* **406**,  
409 528-541, doi:10.1016/j.neuroscience.2019.03.040 (2019).
- 410 8 Gipson, C. D., Kupchik, Y. M. & Kalivas, P. W. Rapid, transient synaptic plasticity in  
411 addiction. *Neuropharmacology* **76 Pt B**, 276-286, doi:10.1016/j.neuropharm.2013.04.032  
412 (2014).
- 413 9 Shen, H. W., Scofield, M. D., Boger, H., Hensley, M. & Kalivas, P. W. Synaptic  
414 glutamate spillover due to impaired glutamate uptake mediates heroin relapse. *J*  
415 *Neurosci* **34**, 5649-5657, doi:10.1523/JNEUROSCI.4564-13.2014 (2014).
- 416 10 Alasmari, F., Bell, R. L., Rao, P. S. S., Hammad, A. M. & Sari, Y. Peri-adolescent  
417 drinking of ethanol and/or nicotine modulates astroglial glutamate transporters and  
418 metabotropic glutamate receptor-1 in female alcohol-preferring rats. *Pharmacol Biochem*  
419 *Behav* **170**, 44-55, doi:10.1016/j.pbb.2018.05.006 (2018).
- 420 11 Derouiche, A. & Frotscher, M. Peripheral astrocyte processes: monitoring by selective  
421 immunostaining for the actin-binding ERM proteins. *Glia* **36**, 330-341 (2001).
- 422 12 Lavielle, M. *et al.* Structural plasticity of perisynaptic astrocyte processes involves ezrin  
423 and metabotropic glutamate receptors. *Proc Natl Acad Sci U S A* **108**, 12915-12919,  
424 doi:10.1073/pnas.1100957108 (2011).
- 425 13 Cholet, N., Pellerin, L., Magistretti, P. J. & Hamel, E. Similar perisynaptic glial  
426 localization for the Na<sup>+</sup>,K<sup>+</sup>-ATPase alpha 2 subunit and the glutamate transporters  
427 GLAST and GLT-1 in the rat somatosensory cortex. *Cereb Cortex* **12**, 515-525,  
428 doi:10.1093/cercor/12.5.515 (2002).
- 429 14 Minelli, A., Barbaresi, P., Reimer, R. J., Edwards, R. H. & Conti, F. The glial glutamate  
430 transporter GLT-1 is localized both in the vicinity of and at distance from axon terminals  
431 in the rat cerebral cortex. *Neuroscience* **108**, 51-59, doi:10.1016/s0306-4522(01)00375-x  
432 (2001).
- 433 15 Reissner, K. J. *et al.* Glutamate transporter GLT-1 mediates N-acetylcysteine inhibition  
434 of cocaine reinstatement. *Addict Biol* **20**, 316-323, doi:10.1111/adb.12127 (2015).
- 435 16 LaCrosse, A. L. *et al.* Contrasting the Role of xCT and GLT-1 Upregulation in the Ability  
436 of Ceftriaxone to Attenuate the Cue-Induced Reinstatement of Cocaine Seeking and  
437 Normalize AMPA Receptor Subunit Expression. *J Neurosci* **37**, 5809-5821,  
438 doi:10.1523/JNEUROSCI.3717-16.2017 (2017).

- 439 17 LaLumiere, R. T. & Kalivas, P. W. Glutamate release in the nucleus accumbens core is  
440 necessary for heroin seeking. *J Neurosci* **28**, 3170-3177,  
441 doi:10.1523/JNEUROSCI.5129-07.2008 (2008).
- 442 18 Scofield, M. D. *et al.* The Nucleus Accumbens: Mechanisms of Addiction across Drug  
443 Classes Reflect the Importance of Glutamate Homeostasis. *Pharmacol Rev* **68**, 816-871,  
444 doi:10.1124/pr.116.012484 (2016).
- 445 19 Smith, A. C. W. *et al.* Accumbens nNOS Interneurons Regulate Cocaine Relapse. *J*  
446 *Neurosci* **37**, 742-756, doi:10.1523/JNEUROSCI.2673-16.2016 (2017).
- 447 20 Smith, A. C. *et al.* Synaptic plasticity mediating cocaine relapse requires matrix  
448 metalloproteinases. *Nat Neurosci* **17**, 1655-1657, doi:10.1038/nn.3846 (2014).
- 449 21 Garcia-Keller, C. *et al.* Extracellular Matrix Signaling Through beta3 Integrin Mediates  
450 Cocaine Cue-Induced Transient Synaptic Plasticity and Relapse. *Biol Psychiatry* **86**,  
451 377-387, doi:10.1016/j.biopsych.2019.03.982 (2019).
- 452 22 Heller, J. P. & Rusakov, D. A. Morphological plasticity of astroglia: Understanding  
453 synaptic microenvironment. *Glia* **63**, 2133-2151, doi:10.1002/glia.22821 (2015).
- 454 23 Dvorzhak, A., Helassa, N., Torok, K., Schmitz, D. & Grantyn, R. Single Synapse  
455 Indicators of Impaired Glutamate Clearance Derived from Fast iGlu u Imaging of Cortical  
456 Afferents in the Striatum of Normal and Huntington (Q175) Mice. *J Neurosci* **39**, 3970-  
457 3982, doi:10.1523/JNEUROSCI.2865-18.2019 (2019).
- 458 24 Lehre, K. P. & Rusakov, D. A. Asymmetry of glia near central synapses favors  
459 presynaptically directed glutamate escape. *Biophys J* **83**, 125-134, doi:10.1016/S0006-  
460 3495(02)75154-0 (2002).
- 461 25 Dietrich, D., Kral, T., Clusmann, H., Friedl, M. & Schramm, J. Presynaptic group II  
462 metabotropic glutamate receptors reduce stimulated and spontaneous transmitter  
463 release in human dentate gyrus. *Neuropharmacology* **42**, 297-305, doi:10.1016/s0028-  
464 3908(01)00193-9 (2002).
- 465 26 Kupchik, Y. M. *et al.* The effect of N-acetylcysteine in the nucleus accumbens on  
466 neurotransmission and relapse to cocaine. *Biol Psychiatry* **71**, 978-986,  
467 doi:10.1016/j.biopsych.2011.10.024 (2012).
- 468 27 Shen, H., Moussawi, K., Zhou, W., Toda, S. & Kalivas, P. W. Heroin relapse requires  
469 long-term potentiation-like plasticity mediated by NMDA2b-containing receptors. *Proc*  
470 *Natl Acad Sci U S A* **108**, 19407-19412, doi:10.1073/pnas.1112052108 (2011).
- 471 28 Moussawi, K. *et al.* N-Acetylcysteine reverses cocaine-induced metaplasticity. *Nat*  
472 *Neurosci* **12**, 182-189, doi:10.1038/nn.2250 (2009).
- 473 29 D'Ascenzo, M. *et al.* mGluR5 stimulates gliotransmission in the nucleus accumbens.  
474 *Proc Natl Acad Sci U S A* **104**, 1995-2000, doi:10.1073/pnas.0609408104 (2007).
- 475 30 Scofield, M. D. *et al.* Gq-DREADD Selectively Initiates Glial Glutamate Release and  
476 Inhibits Cue-induced Cocaine Seeking. *Biol Psychiatry* **78**, 441-451,  
477 doi:10.1016/j.biopsych.2015.02.016 (2015).
- 478 31 Bridges, R., Lutgen, V., Lobner, D. & Baker, D. A. Thinking outside the cleft to  
479 understand synaptic activity: contribution of the cystine-glutamate antiporter (System xc-  
480 ) to normal and pathological glutamatergic signaling. *Pharmacol Rev* **64**, 780-802,  
481 doi:10.1124/pr.110.003889 (2012).
- 482 32 Moran, M. M., McFarland, K., Melendez, R. I., Kalivas, P. W. & Seamans, J. K.  
483 Cystine/glutamate exchange regulates metabotropic glutamate receptor presynaptic  
484 inhibition of excitatory transmission and vulnerability to cocaine seeking. *J Neurosci* **25**,  
485 6389-6393, doi:10.1523/JNEUROSCI.1007-05.2005 (2005).
- 486 33 Corkrum, M., Rothwell, P. E., Thomas, M. J., Kofuji, P. & Araque, A. Opioid-Mediated  
487 Astrocyte-Neuron Signaling in the Nucleus Accumbens. *Cells* **8**,  
488 doi:10.3390/cells8060586 (2019).

- 489 34 Gerfen, C. R. & Surmeier, D. J. Modulation of striatal projection systems by dopamine.  
490 *Annu Rev Neurosci* **34**, 441-466, doi:10.1146/annurev-neuro-061010-113641 (2011).
- 491 35 Martin, R., Bajo-Graneras, R., Moratalla, R., Perea, G. & Araque, A. Circuit-specific  
492 signaling in astrocyte-neuron networks in basal ganglia pathways. *Science* **349**, 730-  
493 734, doi:10.1126/science.aaa7945 (2015).
- 494 36 Lobo, M. K. & Nestler, E. J. The striatal balancing act in drug addiction: distinct roles of  
495 direct and indirect pathway medium spiny neurons. *Front Neuroanat* **5**, 41,  
496 doi:10.3389/fnana.2011.00041 (2011).
- 497 37 Heinsbroek, J. A. *et al.* Loss of Plasticity in the D2-Accumbens Pallidal Pathway  
498 Promotes Cocaine Seeking. *J Neurosci* **37**, 757-767, doi:10.1523/JNEUROSCI.2659-  
499 16.2016 (2017).
- 500 38 Martin-Fardon, R. & Weiss, F. Perseveration of craving: effects of stimuli conditioned to  
501 drugs of abuse versus conventional reinforcers differing in demand. *Addict Biol* **22**, 923-  
502 932, doi:10.1111/adb.12374 (2017).
- 503 39 Knackstedt, L. A., Melendez, R. I. & Kalivas, P. W. Ceftriaxone restores glutamate  
504 homeostasis and prevents relapse to cocaine seeking. *Biol Psychiatry* **67**, 81-84,  
505 doi:10.1016/j.biopsych.2009.07.018 (2010).
- 506 40 Zhou, W. & Kalivas, P. W. N-acetylcysteine reduces extinction responding and induces  
507 enduring reductions in cue- and heroin-induced drug-seeking. *Biol Psychiatry* **63**, 338-  
508 340, doi:10.1016/j.biopsych.2007.06.008 (2008).
- 509 41 Woodcock, E. A., Lundahl, L. H., Khatib, D., Stanley, J. A. & Greenwald, M. K. N-  
510 acetylcysteine reduces cocaine-seeking behavior and anterior cingulate  
511 glutamate/glutamine levels among cocaine-dependent individuals. *Addict Biol*, e12900,  
512 doi:10.1111/adb.12900 (2020).
- 513 42 Gray, K. M. *et al.* A double-blind randomized controlled trial of N-acetylcysteine in  
514 cannabis-dependent adolescents. *Am J Psychiatry* **169**, 805-812,  
515 doi:10.1176/appi.ajp.2012.12010055 (2012).
- 516 43 Amen, S. L. *et al.* Repeated N-acetyl cysteine reduces cocaine seeking in rodents and  
517 craving in cocaine-dependent humans. *Neuropsychopharmacology* **36**, 871-878,  
518 doi:10.1038/npp.2010.226 (2011).
- 519

520 **FIGURES AND LEGENDS**

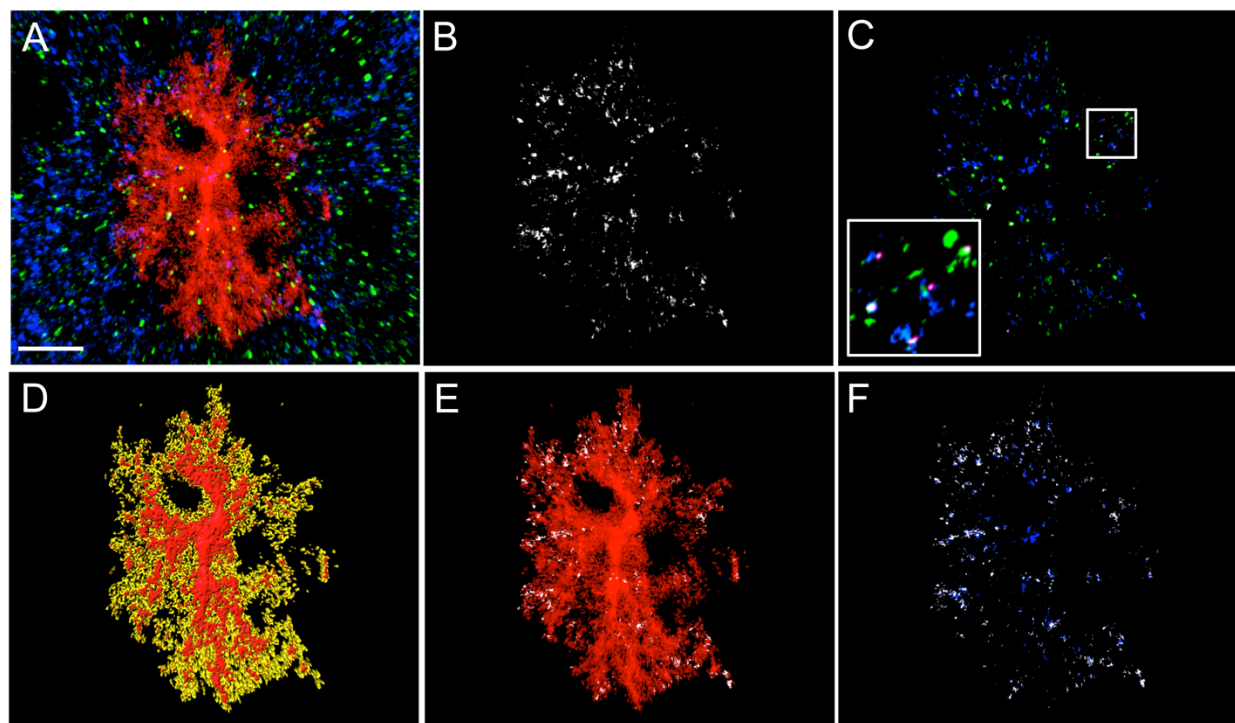

521  
522 **Figure 1. Workflow used for confocal analysis of astroglial morphology and surface-**  
523 **proximal GLT-1. (A)** Z-series depicting an NAcore astrocyte transfected with AAV5/GFAP-  
524 hM3d-mCherry (red) and immuno-labeled for Synapsin I (green) and GLT-1 (blue). **(B)** GLT-1  
525 immunoreactivity co-registered with mCherry in **(A)** is shown in white. **(C)** Co-registration of  
526 GLT-1 (blue) with Synapsin I (green) from the region occupied by the astrocyte in **(A)** is shown  
527 in pink. **(D)** Digital rendering of the astroglial surface (yellow) was used to identify GLT-1 signal  
528 within 250 nm of the cell membrane **(E-F, white)** relative to total GLT-1 from the same astrocyte  
529 **(F, blue)**. Bar in **(A)**= 10  $\mu$ m.



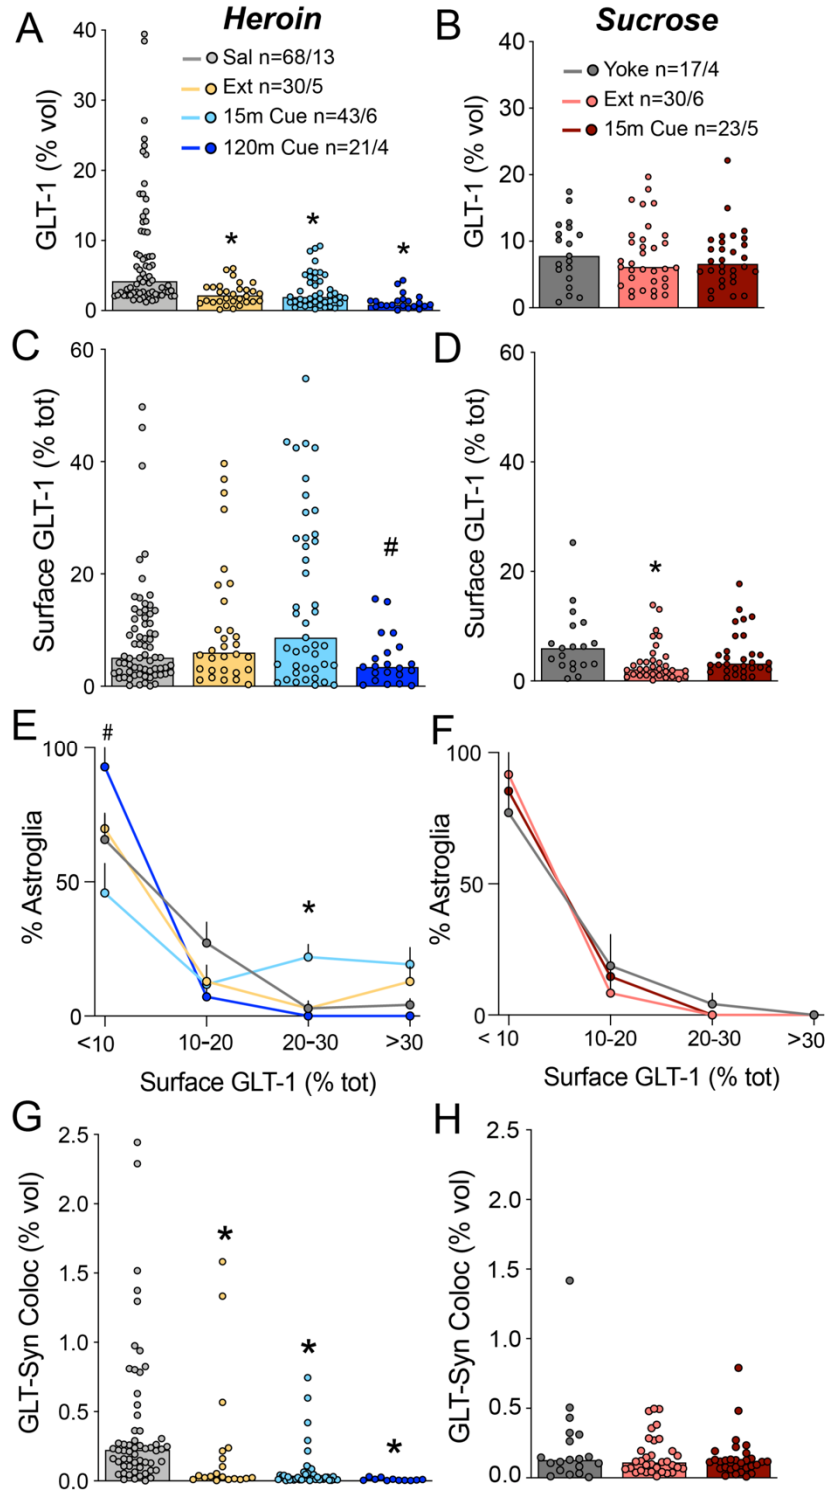

530

531 **Figure 2. Surface expression of GLT-1 was transiently elevated during active heroin**

532 **seeking. (A)** Withdrawal from heroin self-administration produced a downregulation of GLT-1

533 **on NAcore astroglia, whether or not rats were reinstated (Kruskal-Wallis=50.1,  $p < 0.0001$ ). (B)**

534 GLT-1 expression was unchanged after operant training with sucrose (Kruskal-Wallis=0.7336,  
535  $p=0.693$ ). **(C)** Surface-proximal GLT-1, shown here as percent of total GLT-1 from each  
536 astrocyte, was increased during active seeking (15m Cues) compared to extinguished seeking  
537 (120m Cues, Kruskal-Wallis=9.848,  $p<0.05$ ). **(D)** This measure was also significantly reduced  
538 after extinction from sucrose self-administration (Kruskal-Wallis=8.056,  $p<0.05$ ). A greater  
539 proportion of astrocytes exhibited high levels of surface-proximal GLT-1 after 15-min of heroin  
540 cues compared to yoked saline controls **(E)**, 2-way ANOVA,  $F_{6,48}=2.904$ ,  $p<0.05$ ), but no  
541 difference was observed during reinstated sucrose seeking **(F)**, 2-way ANOVA,  $F_{6,36}=0.469$ ,  
542  $p=0.827$ ). Co-registration of GLT-1 with the presynaptic marker Synapsin I analyzed in a  
543 subgroup of the same cells was found to be reduced in heroin- **(G)**, Kruskal-Wallis=54.15,  
544  $p<0.0001$ ; N=58/10 Sal, 19/4 Ext, 43/6 15m Cue, 11/3 120m Cue), but not sucrose-trained rats  
545 **(H)**, Kruskal-Wallis=0.3724,  $p=0.830$ ). N shown in **(A-B)** as cells/animals. \* $p<0.05$  compared to  
546 yoked control, # $p<0.05$  compared to 15-min reinstated.

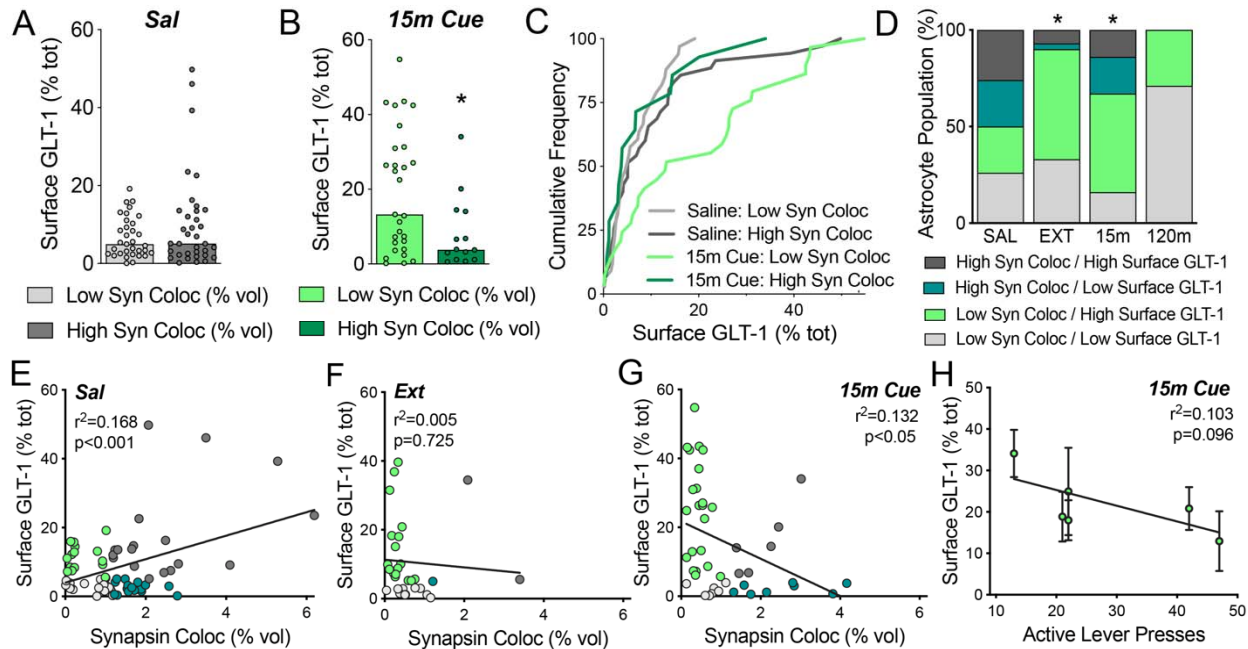

547  
548 **Figure 3. During reinstated seeking, astrocytes with high surface GLT-1 exhibited low**

549 **synaptic proximity.** (A) Splitting astrocytes from yoked saline animals according to the median  
550 of Synapsin I co-registration (1.18% astroglial volume) gives groups of astrocytes with  
551 equivalent levels of surface-proximal GLT-1 (Mann-Whitney=530,  $p=0.566$ ). (B) Applying the  
552 same parameters to astrocytes from rats during 15-min of cued reinstatement revealed that  
553 NAc core astrocytes with high synaptic co-registration exhibited a significant reduction in surface-  
554 proximal GLT-1 relative to astroglia with low synaptic proximity from the same animals (Mann-  
555 Whitney=119,  $p<0.05$ ). (C) Frequency distribution showing that astrocytes with the highest  
556 levels of surface GLT-1 were found in rats reinstated for 15-min and were retracted from  
557 Synapsin I (Kolmogorov-Smirnov=0.3699,  $p<0.05$  Heroin Low vs. Saline Low). (D) NAc core  
558 astroglia were subdivided into 4 populations according to median values of Synapsin I co-  
559 registration and surface GLT-1 (5.11% total GLT-1) in yoked saline rats. Subpopulations were  
560 evenly distributed in yoked saline rats, but not in heroin-trained animals ( $\chi^2_6=20.34$ ;  $p<0.01$ ;  
561 lack of subgroups in 120m reinstated prevents statistical analyses using this group). The  
562 distribution of Synapsin I co-registration and surface GLT-1 measures across populations of  
563 astrocytes is shown in correlation plots in (E-H). Synaptic proximity and surface-proximal GLT-1

564 were positively correlated in NAc core astrocytes from yoked saline rats (**E**,  $r^2=0.168$ ,  $p<0.001$ ).  
565 During 15-min of cued reinstatement, however, the two measures were negatively correlated  
566 (**G**,  $r^2=0.132$ ,  $p<0.05$ ), and astrocytes with high synaptic proximity had low levels of GLT-1  
567 surface expression, and vice versa. No correlation was observed in extinguished rats (**F**,  
568  $r^2=0.005$ ,  $p=0.725$ ). (**H**) A negative correlation between cells with “high” surface GLT-1 for each  
569 animal and active lever pressing during a 15-min reinstatement session was nearly significant  
570 ( $r^2=0.103$ ,  $p=0.096$ ). \* $p<0.05$  compared to yoked saline.

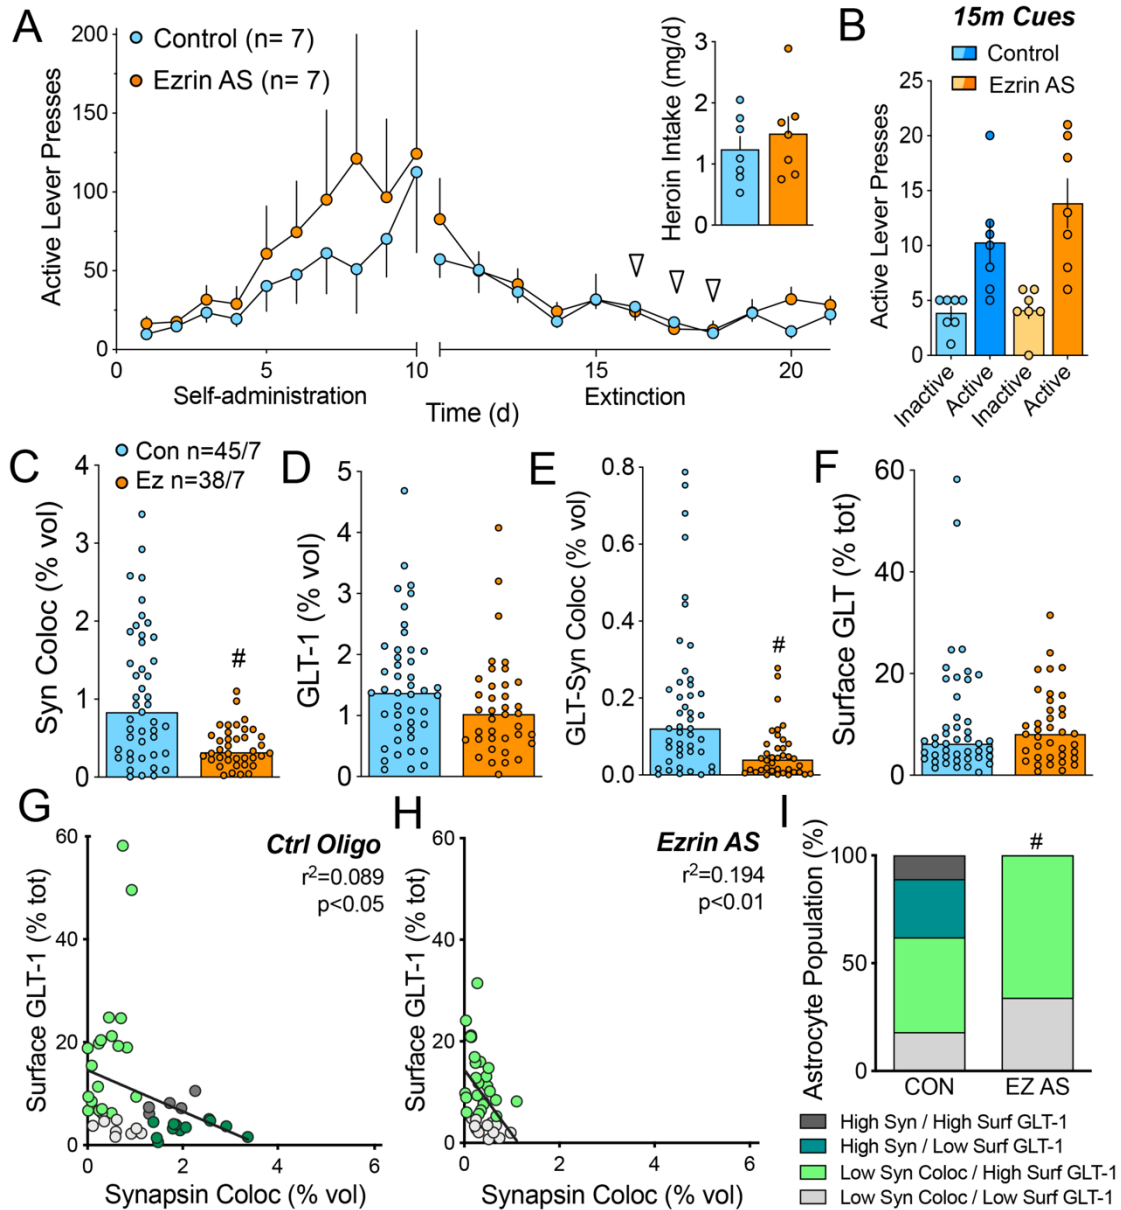

571

572 **Figure 4. Impairing morphological plasticity in NAc core astroglia did not impact surface**

573 **GLT-1 dynamics. (A)** Rats were trained to self-administer heroin over 10 consecutive days.

574 Starting on day 6 of extinction training prior to the session for 3 consecutive days (white

575 arrowheads), animals received NAc core infusions of an ezrin antisense oligomer or a control

576 oligomer. Inset shows that both groups received similar amounts of heroin during self-

577 administration (unpaired Student's  $t_{12}=0.737$ ,  $p=0.521$ ). 24h after the final extinction session,

578 animals were reinstated for 15-min by exposure to light and tone cues previously paired with

579 heroin delivery. **(B)** Rats that underwent ezrin knockdown pressed higher on the active lever  
580 during a 15-min reinstatement session (1-way ANOVA  $F_{3,24}=3.663$ ,  $p<0.05$  control active lever  
581 vs. ezrin AS active lever). **(C)** Astrocytes from rats treated with the ezrin antisense oligo  
582 exhibited a significant reduction in synaptic co-registration, consistent with knockdown of  
583 astrocyte peripheral process motility (Mann-Whitney=461,  $p<0.001$ ). **(D)** GLT-1 levels were  
584 unchanged by ezrin antisense oligo delivery (Mann-Whitney=652,  $p=0.064$ ). **(E)** The co-  
585 registration between GLT-1 and Synapsin I on astroglia was significantly reduced after ezrin  
586 knockdown (Mann-Whitney=424,  $p<0.0001$ ), but the proportion of surface-proximal GLT-1 was  
587 unchanged **(F)**, Mann-Whitney=806.5,  $p=0.661$ ). **(G)** Subpopulations from control oligo-treated  
588 rats were similar to previously quantified subpopulations during 15-min of reinstated seeking  
589 (Ctrl Oligo,  $r^2=0.0875$ ,  $p<0.05$ ). **(H)** The negative correlation between Synapsin I co-registration  
590 and surface GLT-1 was maintained after ezrin knockdown, despite loss of subpopulations  
591 characterized by a high degree of synaptic co-registration ( $r^2=0.194$ ,  $p<0.01$ ). Proportion of  
592 subpopulations in the two treatment groups is shown in **(I)**,  $\text{Chi}^2_3=18.29$ ,  $p<0.001$ ). # $p<0.05$   
593 compared to control oligo treatment.

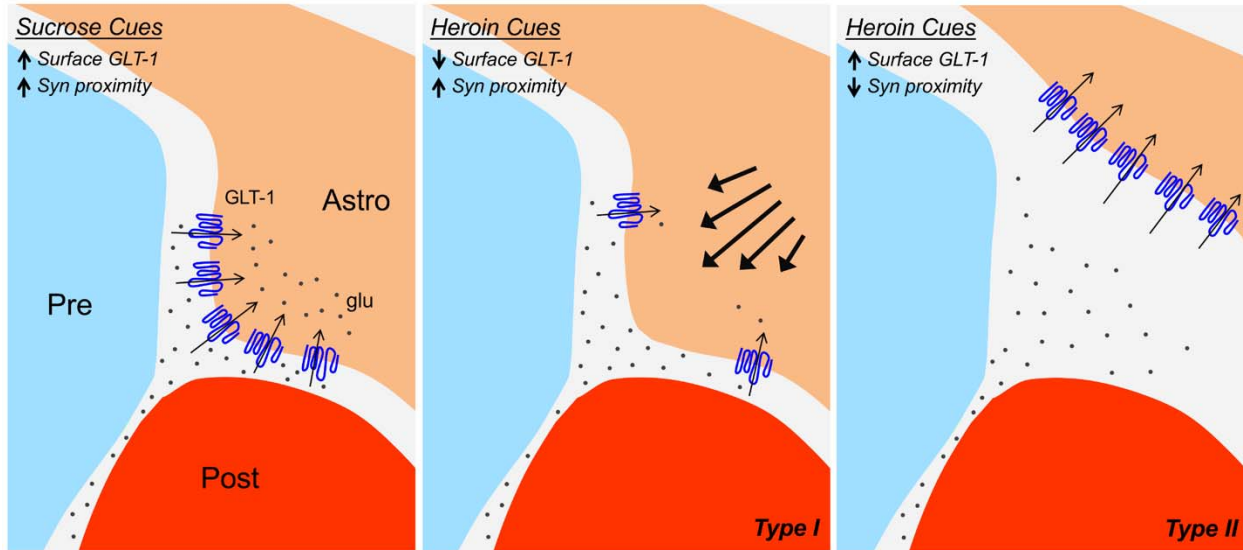

594  
595 **Figure 5. Heroin cues reveal two types of astroglial plasticity that regulate cue-induced**

596 **heroin seeking.** Following operant training with a natural reinforcer like sucrose, synaptic  
597 glutamate release is rapidly recovered by high levels of GLUT-1 on the astroglial surface adjacent  
598 to NAc core synapses (left). Perisynaptic proximity of astroglial processes facilitates glutamate  
599 uptake and autoinhibition of glutamate release through stimulation of presynaptic autoreceptors,  
600 such as mGluR2/3. During heroin withdrawal, astrocyte processes retract from NAc core  
601 synapses and downregulate GLUT-1, permitting glutamate spillover and disrupting autoinhibitory  
602 mechanisms that regulate glutamate release. During reinstated heroin seeking, NAc core  
603 astroglia adapt in one of two discrete ways to partly suppress reinstated heroin seeking. In Type  
604 I astroglia (middle), morphological plasticity restores synaptic proximity of astroglial processes,  
605 presumably at the postsynapse, biasing synaptic glutamate spillover towards autoinhibitory  
606 mGluR2/3 and away from postsynaptic NR2B that potentiates seeking. In Type II astroglia,  
607 GLUT-1 is increased on the astroglial surface at extrasynaptic domains (right). We hypothesize  
608 that this process may prevent recruitment of nNOS interneurons that trigger post-synaptic  
609 plasticity and enhance reinstated seeking through release of NO and activation of matrix  
610 metalloproteases.
