1                   **Plasticity in astrocyte subpopulations regulates heroin relapse**

2           Anna Kruyer<sup>1\*</sup>, Ariana Angelis<sup>1</sup>, Constanza Garcia-Keller<sup>1</sup>, Hong Li<sup>2</sup>, and Peter W. Kalivas<sup>1</sup>

3

4   <sup>1</sup>Department of Neuroscience, Medical University of South Carolina, Charleston, SC, USA.

5   <sup>2</sup>Department of Biostatistics & Bioinformation, Medical University of South Carolina, Charleston,  
6   SC, USA.

7   \*Correspondence should be addressed to A.K. (173 Ashley Ave, MSC510, Charleston, SC,  
8   29425; 843-876-2246, [kruyer@musc.edu](mailto:kruyer@musc.edu)).

9

10   **Short Title:** Astrocyte subpopulations regulate heroin relapse

11   **Keywords:** astrocyte, synapse, GLT-1, ezrin, heroin, nucleus accumbens core, self-  
12   administration

13

14   41 pages

15   6 figures, 7 supplementary figures, 1 supplementary table

16   Abstract = 133/150 words

17   Main text = 9,453/15,000 words

18   References = 64/80

19 **ABSTRACT** (133/150 words)

20 Opioid use disorder (OUD) produces detrimental personal and societal consequences. Astrocytes  
21 are a major cell group in the brain that receives little attention in mediating OUD. We determined  
22 how astrocytes and the astroglial glutamate transporter, GLT-1, in the nucleus accumbens core  
23 adapt and contribute to heroin seeking in rats. Seeking heroin, but not sucrose, produced two  
24 transient forms of plasticity in different astroglial subpopulations. Increased morphological  
25 proximity to synapses occurred in one subpopulation and increased extrasynaptic GLT-1  
26 expression in another. Augmented synapse proximity by astroglia occurred selectively at D2-  
27 dopamine receptor expressing dendrites, while changes in GLT-1 were not neuron-subtype  
28 specific. Importantly, mRNA-antisense inhibition of either morphological or GLT-1 plasticity  
29 promoted cue-induced heroin seeking. We show that heroin cues induce two distinct forms of  
30 transient plasticity in separate astroglial subpopulations that dampen heroin relapse.

31 **TEASER** (94/125 characters w spaces)

32 Different subpopulations of astrocytes engage with accumbens synapses to dampen heroin

33 relapse.

## 34 INTRODUCTION

35 Relapse to opioid use is a leading cause of death in the United States. Decades of research  
36 demonstrate the importance of glutamate dysregulation at nucleus accumbens core (NAcore)  
37 synapses as a causative factor in relapse-like behavior in animal models (1). Glutamate  
38 dysregulation in animal models of addiction is due in large part to changes in NAcore astroglia  
39 that express the glutamate transporter GLT-1, which terminates the actions of the bulk of  
40 synaptically-released glutamate (2, 3). Addictive substances, including alcohol, nicotine,  
41 psychostimulants, and opioids induce an enduring downregulation of GLT-1 on astrocytes in the  
42 NAcore (4). Furthermore, astroglial processes that insulate synapses and take up glutamate  
43 during synaptic transmission retract from NAcore synapses after extinction from cocaine, heroin,  
44 and methamphetamine use, but not following sucrose self-administration and extinction (5-7).  
45 Synaptic retraction of astrocyte processes and downregulation of GLT-1 disrupt glutamate  
46 homeostasis at NAcore synapses, permitting spillover of synaptic glutamate and postsynaptic  
47 potentiation required for drug-associated cues to initiate drug seeking (8).

48

49 We previously found that synaptic retraction of NAcore astroglia after heroin withdrawal is partially  
50 and transiently reversed during cue-induced heroin seeking (6). We hypothesize that heroin cue-  
51 induced increased proximity of astroglia to synapses increases the synaptic adjacency of GLT-1  
52 on perisynaptic astroglial processes, thereby serving to minimize spillover of synaptically-  
53 released glutamate that mediates cue-induced drug seeking. We also sought to determine  
54 whether synaptic reassociation of astroglial processes stimulated by heroin-associated cues was  
55 selective for either of the two main neural subtypes in the NAcore, D1 or D2 receptor-expressing  
56 medium spiny neurons (D1- or D2-MSNs) (9), which exert opposing control over drug-seeking  
57 behaviors (10-13).

58

59 We used confocal microscopy to measure the synaptic co-registration of labeled astrocytes and  
60 astroglial GLT-1 in the NAc core after extinction or reinstatement of heroin or sucrose seeking. We  
61 found that cued reinstatement of heroin, but not sucrose, seeking produced two transient  
62 adaptations that parsed into distinct astroglial subpopulations. In one subpopulation, heroin cues  
63 increased synaptic adjacency of astroglial processes without increasing surface-proximal GLT-1,  
64 and in the second subpopulation, cued reinstatement elevated surface GLT-1 on astroglia  
65 situated more than 250 nm from the synaptic cleft. We independently disrupted the two forms  
66 cue-induced plasticity in each subpopulation of NAc core astroglia by knocking down GLT-1 or by  
67 reducing synthesis of ezrin, an astroglial selective actin binding protein that mediates  
68 morphological plasticity in distal astroglial processes (14-18). Either knockdown augmented the  
69 capacity of cues to induce heroin seeking. When we assessed whether astrocytes exhibited a  
70 bias in their synaptic adjacency with D1- or D2-MSN synapses, we found that astrocytes  
71 selectively associated with D1-MSN synapses after extinction of heroin seeking and retracted  
72 from D2-MSNs, and that this pattern was reversed during cue-reinstated heroin seeking.  
73 Moreover, the cue-induced increase in surface GLT-1 was not detected adjacent to either D1- or  
74 D2-MSN dendrites during reinstated heroin seeking, supporting a functional role for GLT-1-  
75 deficient astroglial processes in shaping synaptic activity. In keeping with abundant literature  
76 demonstrating suppression of synaptic activity by perisynaptic astroglia (19, 20), we propose that  
77 astrocyte insulation of D1-MSN synapses after extinction training suppresses D1-MSN activity to  
78 reduce seeking, while retraction from D2-MSNs permits their potentiation. The reversal of this  
79 pattern during cue presentation would instead permit D1-MSN potentiation, which is known to  
80 drive cued drug seeking (10). In all, our data show that astrocyte morphological plasticity is neuron  
81 subtype-selective and that two distinct forms of astroglial plasticity are transiently induced by  
82 heroin cues in separate subpopulations of astrocytes to dampen cue-induced heroin seeking.

## 83 RESULTS

### 84 GLT-1 surface expression was transiently elevated during cued heroin seeking

85 To examine whether enhanced synaptic proximity of NAc core astroglia suppressed cue-induced  
86 heroin seeking through changes in synaptic adjacency of GLT-1, NAc core astroglia were  
87 selectively labeled with a membrane-bound fluorescent reporter prior to operant training. Rats  
88 were trained to self-administer heroin or sucrose and reward delivery was paired with light and  
89 tone cues (Fig. 1A). Importantly, heroin intake was equivalent in rats placed in the extinction, 15-  
90 min or 120-min reinstated groups (Fig. 1A inset). Animals that received yoked saline delivery and  
91 cues served as controls for heroin-trained rats and animals that received yoked cues were  
92 controls for sucrose-trained rats. Operant responding was extinguished by removing both the  
93 cues and reinforcers, and a portion of rats were reinstated by restoring conditioned cues without  
94 reinforcers to active lever pressing for 15 or 120 min (Fig. 1B). Rats used to generate the data in  
95 Figs. 1A-B were included in a previous study (6) and in the present report mCherry transduced  
96 astrocytes in tissue slices from these rats were immuno-labeled for both Synapsin I and GLT-1.  
97 NAc core slices from each treatment group (yoked, extinguished, 15-min reinstated, 120-min  
98 reinstated) were double-labeled for GLT-1 and the presynaptic marker Synapsin I and imaged  
99 using confocal microscopy (Fig. 1C). Total GLT-1, co-registered Synapsin I, and co-registered  
100 GLT-1 and Synapsin I were quantified and normalized to the volume of each mCherry-labeled  
101 astrocyte (Fig. 1D-E). To estimate the proportion of surface-proximal GLT-1, we digitally isolated  
102 GLT-1 within 250 nm of the astroglial membrane as a proportion of total GLT-1 in each astrocyte  
103 (Fig. 1F-H).

104

105 Co-registration of the astroglial membrane with Synapsin I was reduced after withdrawal from  
106 heroin (Fig. 2A), but not sucrose (Fig. S1A). We also found reductions in total astrocyte GLT-1  
107 expression after extinction from heroin (Fig. 2B), but not sucrose self-administration (Fig. S1B).  
108 Although total GLT-1 was reduced in heroin extinguished rats, the proportion of surface-proximal

109 GLT-1 was unaltered in extinguished rats (Fig. 2C). Moreover, 15 min of cue exposure transiently  
110 increased the proportion of astroglia expressing the highest levels of surface-proximal GLT-1 (Fig.  
111 2D). Both the increase in synapse-proximal astroglia and GLT-1 after 15-min of heroin cue were  
112 transient and returned to extinction levels by 120-min after initiating cued reinstatement (Fig.  
113 2A,C-D). Interestingly, the ratio of surface:total GLT-1 was reduced in the NAc core of rats  
114 extinguished from sucrose (Fig. S1C), but not altered by cued reinstatement (Fig. S1C-D). The  
115 co-registration of GLT-1 with Synapsin I was reduced after extinction from heroin self-  
116 administration (Fig. 2E), but not sucrose self-administration (Fig. S1E). Despite increases in  
117 surface GLT-1 and synaptic adjacency by NAc core astroglia, the proximity of GLT-1 to the  
118 presynaptic marker Synapsin I was not restored by cued heroin seeking (Fig. 2E-F). Instead, the  
119 increase in surface-proximal GLT-1 in reinstated animals was targeted extrasynaptically (>250  
120 nm from the synapse) (Fig. 2G-H). In sucrose-trained rats, levels of synaptic and extrasynaptic  
121 GLT-1 were not changed by extinction training or cued reinstatement of sucrose seeking (Fig.  
122 S1F-H). Importantly, extinction from heroin self-administration did not change total Synapsin I  
123 expression in the NAc core (Fig. S2).

124

### 125 **Astrocyte heterogeneity in heroin cue-induced plasticity**

126 The fact that astrocyte synaptic proximity was transiently increased by 15 min of cued heroin  
127 reinstatement, but the increase in surface-proximal GLT-1 did not co-register with Synapsin I  
128 indicates that these cue-induced astroglial adaptations may occur in distinct subpopulations of  
129 astrocytes. Indeed, principal component analysis (PCA, Fig. S3) (21) of astroglia from saline-,  
130 heroin- and sucrose-trained rats identified three distinct clusters of astroglia we arbitrarily refer to  
131 as types 1-3: type 1, astrocytes with high synaptic co-registration; type 2, astrocytes with high  
132 levels of extrasynaptic GLT-1, and type 3, astrocytes with low-to-moderate synaptic adjacency  
133 and surface GLT-1 expression (Fig. 3A). A majority of NAc core astrocytes from yoked saline rats  
134 were in the type 1 and 3 subpopulations (Fig. 3B, E). Following extinction from heroin self-

135 administration there was a loss of type 1 and an increase in type 2 astrocytes (Fig. 3C, E). Fifteen  
136 min of cued heroin reinstatement resulted in a transient restoration of type 1 astrocytes, and an  
137 increase in the proportion of type 2 astroglia (Fig. 3D, E). In contrast with heroin self-administration  
138 and akin to saline rats, all three treatment groups of sucrose-trained rats contained predominately  
139 type 1 and 3 astrocytes (Fig. S4A). Along with the lack of GLT-1 co-registration with Synapsin I  
140 during cued reinstatement (Fig. 2E), these data are consistent with the presence of three distinct  
141 astroglial populations in heroin-seeking animals, which is also indicated by the lack of GLT-1  
142 immuno-staining in some NAc core astroglia (Fig. S5). Fig. 3F illustrates the distinct morphology  
143 and GLT-1 localization characteristic of each astroglial type.

144

#### 145 **G<sub>q</sub> signaling in NAc core astroglia increased synaptic adjacency, but not surface GLT-1**

146 G<sub>q</sub>-coupled signaling through metabotropic glutamate receptor mGluR5 on cultured astroglia  
147 promotes ezrin-dependent astrocyte fine process motility (15). Moreover, cue-induced heroin  
148 seeking is associated with increased ezrin phosphorylation (6) and astrocyte proximity to  
149 synapses (Fig. 2A), and increases in synaptic glutamate spillover in NAc core that occur during  
150 cued reinstatement of drug seeking (22) could stimulate mGluR5 on astroglial processes (23). To  
151 determine if G<sub>q</sub>-type mGluR signaling triggers cue-induced astrocyte process motility, a G<sub>q</sub>-  
152 coupled designer receptor activated by designer drug (DREADD) was delivered selectively to  
153 NAc core astroglia (Fig. 4A). Rats were trained to self-administer heroin before undergoing 10 days  
154 of extinction training (Fig. 4B). In lieu of reinstatement, animals were given clozapine N-oxide  
155 (CNO) or vehicle and their brains were removed after 30-min for analysis of astrocyte synaptic  
156 adjacency and surface-proximal GLT-1 expression. CNO delivery increased the co-registration of  
157 the astroglial membrane with Synapsin I-positive puncta (Fig. 4C), but did not impact surface-  
158 proximal GLT-1 levels (Fig. 4D). These data indicate that G<sub>q</sub> signaling in NAc core astroglia triggers  
159 morphological plasticity during reinstatement, while the increase in extrasynaptic GLT-1  
160 expression (Fig. 2G-H) likely involves a different signaling cascade.



161

162 **Reducing cue-induced plasticity in astroglial subpopulations increased heroin seeking**

163 To determine whether cue-induced type 1 and type 2 astroglial plasticity (as shown in Fig. 3F)  
164 impacted heroin seeking, we implanted cannulae above the NAc core and trained rats to self-  
165 administer heroin (Fig. 5A). Rats were divided to maintain equal heroin intake across the  
166 reinstated groups (Fig. 5B) and received bilateral infusions of an inert control vivo-morpholino  
167 antisense oligomer, or an oligo targeted to GLT-1 (24) or ezrin (6) on days 6-8 of extinction  
168 training. Rats were reinstated by exposure to heroin cues and either ezrin or GLT-1 knockdown  
169 potentiated cued seeking (Fig. 5C). Thus, the presence of either type 1 or type 2 astroglial  
170 plasticity during cued heroin seeking serves a compensatory function to suppress heroin seeking.

171

172 Confirming that cannulae placement and morpholino infusions did not impact cue-induced  
173 astrocyte plasticity, both type 1 and type 2 adaptations were observed during 15 min of cue-  
174 induced heroin seeking in rats treated with control oligo (compare Fig. S4B with Fig. 3D). Ezrin  
175 knockdown reduced the synaptic proximity of astroglia in the NAc core (Fig. 5D) and GLT-1  
176 knockdown reduced total and surface proximal GLT-1 (Fig. 5E-F). Validating the specificity of the  
177 oligos and supporting the presence of distinct subpopulations of astrocytes, the ezrin-targeted  
178 oligo selectively eliminated type 1 astrocytes while the GLT-1 targeted oligo selectively eliminated  
179 type 2 astrocytes in rats reinstated by heroin cues for 15 min (Fig. S4B). Moreover, GLT-1  
180 knockdown did not alter synaptic proximity of NAc core astroglia (Fig. 5D), and ezrin knockdown  
181 did not impact levels of total GLT-1 or surface-proximal GLT-1 (Fig. 5E-F). As expected,  
182 independent knockdown of either GLT-1 or ezrin reduced GLT-1 co-registration with Synapsin I  
183 (Fig. 5G).

184

185 Taken together these data show that all three types of astroglia are present during cue-induced  
186 heroin seeking (Fig. 3F). Akin to extinguished rats, heroin cues are associated with type 2

187 astroglia having increased surface-proximal expression of GLT-1, and akin to their presence in  
188 control saline or sucrose rats, cues induce the presence of type 1 astroglia that have high synaptic  
189 proximity. The subpopulations are distinct cells and are regulated by distinct signaling pathways.  
190 Importantly, the presence of either type 1 or type 2 subpopulations serves to inhibit cue-induced  
191 heroin seeking.

192

193 **NAcore astrocytes differentially associated with D1- and D2-MSNs at baseline and after**  
194 **heroin**

195 Activity in the two main neuronal subtypes in the NAcore, D1- and D2-MSNs promotes drug  
196 seeking and extinction of seeking, respectively (25, 26) and individual astrocytes in the dorsal  
197 striatum signal uniquely with these two neuronal subclasses (19, 27). We hypothesized that the  
198 different functional types of astroglia depicted in Fig. 3F would associate uniquely with D1- and  
199 D2-MSNs, thereby contributing to their differential functional roles in heroin extinction and cue-  
200 induced seeking. To test this hypothesis, we labeled astrocytes and neurons in male and female  
201 D1- and D2-Cre transgenic rats before training animals to self-administer heroin for 10 days (Fig.  
202 6A-B). Some rats were then reinstated for 15-min by exposure to heroin-associated cues (Fig.  
203 6C). Isolated astroglia were imaged and their co-registration with virally-labeled D1- or D2-MSN  
204 dendrites and the synaptic marker Synapsin I or GLT-1 was quantified (Fig. 6D-G). Pooling data  
205 from D1- and D2-Cre rats revealed the same synaptic retraction by astroglia from NAcore  
206 dendrites after extinction and re-insertion of astroglial processes toward synapses during cued  
207 reinstatement (Fig. 6H) as was observed in Sprague-Dawley rats (Fig. 2A). Interestingly, when  
208 astrocyte-synapse co-registration data were analyzed separately in D1- and D2-Cre rats, the  
209 astrocyte association with D1-MSN synapses was lower in yoked saline animals compared with  
210 D2-MSN synapses (compare saline-treated groups in Fig. 6I-J). After extinction training, astrocyte  
211 co-registration with Synapsin I was increased at D1-MSN synapses (Fig. 6I) and decreased at

212 D2-MSN synapses (Fig. 6J). Fifteen minutes of exposure to heroin cues restored astrocyte  
213 association with both synaptic types to control levels (Fig. 6I-J).

214

215 In contrast with the morphological adaptations, when data from D1- and D2-Cre rats were pooled  
216 the surface-proximal GLT-1 that co-registered with NAcore dendrites did not fully parallel the  
217 findings in Sprague-Dawley rats (Fig. 2C). Although GLT-1 was reduced in extinguished rats, the  
218 increase in surface-proximal GLT-1 after 15-min cued heroin seeking (Fig. 2D) was replicated in  
219 the pooled D1- and D2-Cre data (Fig. 6K). When dendritic adjacency of GLT-1 was examined  
220 separately in D1- and D2-Cre rats, levels of GLT-1 adjacent to D2 dendrites was higher when  
221 compared with D1 dendrites (compare saline-treated groups in Fig. 6L-M). The extinction-  
222 associated reduction in the pooled data occurred at D2-, not D1-dendrites (Fig 6L-M). However,  
223 the increase in surface-proximal GLT-1 after 15 min of cue exposure did not co-register with either  
224 D1 or D2-dendrites (Fig. 6L-M). Both the morphological plasticity and GLT-1 dynamics in NAcore  
225 astroglia from D1- and D2-Cre animals occurred in a manner that was not sex-specific (Fig. S6).

226

227 Taken together, these data show that the cue-induced increase in type 1 astroglia during heroin  
228 seeking (Fig. 3D-E) can be linked to morphological plasticity of astroglia surrounding D2-dendrites  
229 (Fig. 6H-J), but that the cue-induced increase in type 2 astroglia exhibiting high levels of  
230 extrasynaptic GLT-1 (Fig. 3D-E) are not associated with either D1- or D2-dendrites (Fig. 6K-M).  
231 A summary schematic illustrating subcircuit-selective astrocyte adaptations after extinction of  
232 heroin seeking is shown in Fig. S7.

## 233 **DISCUSSION**

234 Synaptic glutamate spillover from prefrontal cortical synapses in NAcCore is produced by drug  
235 associated cues and is necessary for drug cues to induce synaptic adaptations that regulate the  
236 intensity of drug seeking. Astroglia possess the capacity to strongly regulate glutamate spillover  
237 from synapses by their morphological proximity to synapses (28) and their expression of GLT-1,  
238 especially in perisynaptic astroglial processes (29-32). We show that during cue-induced heroin  
239 seeking, astroglia employ both of these mechanisms to dampen the intensity of seeking.  
240 Surprisingly, cue-induced increases in synaptic proximity and surface GLT-1 expression occurred  
241 in separate astroglial subpopulations. Type 1 astroglia had greater proximity to synapses in  
242 NAcCore, while type 2 astroglia showed increased surface expression of GLT-1. The functional  
243 relevance of cues transiently inducing these astroglial subpopulations was shown by selectively  
244 eliminating either type 1 or type 2 astroglial plasticity and potentiating cue-induced heroin seeking.  
245 Finally, we demonstrated that the type 1 adaptation was selective for D2-, not D1-MSNs during  
246 seeking, while the cue-induced type 2 adaptation was not significantly associated with either D1-  
247 or D2-MSNs. Together, our data reveal at least two mechanisms whereby astroglia negatively  
248 regulate cue-induced motivation to seek heroin, but not sucrose. At least part of this action may  
249 arise from G<sub>q</sub>-coupled stimulation of astroglial processes toward D2-MSN synapses.

250

### 251 **Distinct subpopulations of astroglia during cue-induced heroin seeking**

252 During cue-induced heroin seeking three distinct subpopulations of astroglia were present, type  
253 1 showing increased synaptic proximity, type 2 showing upregulated surface GLT-1 and type 3  
254 having relatively lower levels of both synaptic adjacency and surface GLT-1. Unbiased PCA  
255 revealed that type 1 and type 2 adaptations were in distinct subpopulations of astroglia. The  
256 appearance of type 1 and type 2 subpopulations induced by cued seeking was transient and  
257 absent after 120 min of unrewarded seeking. This is similar to the transient potentiation of D1-  
258 MSNs triggered by drug-associated cues (26, 33).

259

260 Control saline or sucrose rats showed largely type 1 and 3 astroglia. Type 2 astroglia emerged  
261 while type 1 were eliminated in heroin extinguished rats. Cue-induced heroin seeking was  
262 accompanied by transient return of type 1 astroglia to levels present in control rats and a transient  
263 elevation in the proportion of astroglia expressing the type 2 adaptation. In sum, our data clearly  
264 show that the appearance and disappearance of different types of astroglial adaptations depends  
265 on their stage in the addiction protocol (i.e. extinguished vs. relapsing) and reveals remarkable  
266 morphological and signaling plasticity in astroglia to negatively regulate cue-induced heroin  
267 seeking.

268

269 **Type 1 astroglia: Cue-induced morphological plasticity with no increase in surface GLT-1**

270 A portion of mature synapses throughout the brain are insulated by astroglia (34), and the  
271 perisynaptic astroglial membrane expresses the highest density of GLT-1, glutamate receptors  
272 and other proteins, including actin binding proteins like ezrin, which together contribute to  
273 modulating glutamatergic synaptic activity. Perisynaptic astroglia modulate synaptic glutamate  
274 homeostasis in part through dynamic morphological plasticity in response to synaptic  
275 neurotransmission (29, 34, 35). In the hippocampus and cerebellum, the astroglial sheath is  
276 biased toward the postsynapse (36), permitting access of synaptically released glutamate onto  
277 presynaptic mGluR2/3 autoreceptors that negatively regulate release probability (37). Notably,  
278 dense expression of GLT-1 proximal to the synapse may prevent recruitment of this autoinhibitory  
279 mechanism, by retrieving glutamate from the synapse and thus reducing glutamate concentration  
280 at presynaptic autoreceptors. In this way, the GLT-1-deficient astroglial processes present in the  
281 type 1 subpopulation can promote autoinhibitory regulation of excitatory transmission in the  
282 NAc core by sterically guiding synaptically released glutamate towards presynaptic mGluR2/3 in  
283 the absence of glutamate uptake. The importance of guiding glutamate to presynaptic mGluR2/3

284 to negatively regulate relapse is supported by the fact that stimulating mGluR2/3 in the  
285 accumbens inhibits drug seeking (38, 39).

286

287 Astrocyte fine process motility is increased by activating G<sub>q</sub>-coupled mGluR5 (15, 16). Also,  
288 stimulating G<sub>q</sub>-DREADD in NAc core astroglia reduces reinstated cocaine seeking by promoting  
289 astroglial glutamate release onto presynaptic mGluR2/3 (40). Our findings complement this work  
290 by showing that activating astroglial G<sub>q</sub>-DREADD in the NAc core increases the number of synaptic  
291 puncta with near-adjacent astroglial processes, although the resolution limit of confocal  
292 microscopy does not permit us to determine whether astroglial processes were oriented toward  
293 the pre- or postsynapse after DREADD stimulation. Increasing G<sub>q</sub> signaling in NAc core astroglia  
294 did not impact surface-proximal GLT-1 levels, supporting discrete signaling mechanisms for  
295 heroin cue-induced formation of type 1 and type 2 astroglial plasticity.

296

297 In addition to potentially guiding synaptically released glutamate toward mGluR2/3 autoreceptors,  
298 the synaptic re-association induced by heroin cues in type 1 astroglia may limit access of synaptic  
299 glutamate (i.e. glutamate spillover) to perisynaptic NMDA glutamate receptors containing the 2B  
300 subunit (NR2B) that must be stimulated for cues to initiate heroin seeking, and for the synaptic  
301 potentiation that accompanies heroin seeking (33). Finally, not only would synaptic insulation by  
302 astroglial processes be more likely to engage presynaptic autoinhibition and block access to  
303 NR2B necessary for synaptic potentiation, but synaptic adjacency of astroglial processes reduces  
304 the possibility of synaptic recruitment that occurs via transmitter spillover to neighboring  
305 synapses. This is supported by the fact that synaptic retraction of astroglial processes after LTP  
306 induction promotes synaptic crosstalk (41).

307

308 **Type 2 astroglia: Cue-induced increases in surface-proximal GLT-1 with no change in**  
309 **synaptic proximity**

310 A portion of astroglia responded to heroin use and extinction by increasing surface-proximal GLT-  
311 1 and this adaptation was transiently accentuated by heroin cues. However, the increase in GLT-  
312 1 did not co-register with Synapsin I in either treatment group, indicating that surface GLT-1 in  
313 extinguished and reinstated animals was distant (>250 nm) from the synapse (i.e. extrasynaptic).  
314 Moreover, the increase in surface GLT-1 during seeking was not associated with either D1- or  
315 D2-dendrites. We hypothesize that type 2 astroglia do not guide glutamate spillover to presynaptic  
316 autoreceptors or sterically shield extrasynaptic high affinity glutamate receptors from synaptic  
317 glutamate, as discussed above for type 1 astroglia. However, diffusion of glutamate to more distal  
318 sites would be reduced by increased extrasynaptic GLT-1 (22). Thus, the primary impact of type  
319 2 astroglia may be to deny access of synaptic glutamate to neighboring synapses thereby  
320 preventing synaptic recruitment. Notably, by inhibiting glutamate access to neuronal nitric oxide  
321 synthase (nNOS) interneurons where mGluR5 stimulation promotes NO-induced synaptic  
322 potentiation in D1-MSNs (42) or reducing NR2B stimulation on adjacent synapses (33),  
323 extrasynaptic GLT-1 could dampen cued heroin seeking and the associated synaptic potentiation  
324 (43).

325  
326 While some studies demonstrate that the bulk of GLT-1 is on the astroglial surface (31), there are  
327 notable differences between hippocampal or cultured astrocytes and striatal astrocytes studied  
328 here (44). Our data indicate that a proportion of NAc core astroglia express relatively high levels of  
329 surface-proximal GLT-1 and that these cells target their GLT-1 extrasynaptically during relapse.  
330 Heterogeneity in GLT-1 expression by NAc core astroglia is depicted in Fig. S5 and is further  
331 supported by the non-Gaussian distribution of GLT-1 expression quantified on astrocytes from  
332 yoked saline control animals (Fig. 2B-C). Notably, type 2 astrocytes that exhibit high levels of  
333 surface-GLT-1, but low synaptic proximity were not abundant in control saline or sucrose groups,  
334 but emerged after extinction from heroin self-administration. Whether this adaptation was a  
335 consequence of heroin, heroin withdrawal or extinction training during withdrawal is a remaining

336 question. However, it is noteworthy that extinction from sucrose self-administration did not  
337 increase the presence of type 2 astroglia, indicating that extinction train per se is not sufficient to  
338 produce this adaptation.

339

340 That  $G_q$  signaling did not stimulate plasticity in type 2 astroglia raises the possibility that levels  
341 and/or patterns of  $G_q$ -coupled receptor expression may distinguish type 1 from type 2 astroglia.  
342 In keeping with this hypothesis, astroglial mGluR5 signaling stimulates peripheral process motility  
343 (15) and down-regulates GLT-1 (45). Such a dual role for mGluR5 signaling would contribute to  
344 the relatively low levels of surface GLT-1 in type 1 astroglia. Alternatively, stimulation of astroglial  
345 mGluR3 has been linked to increased GLT-1 expression (45), raising the possibility that cue-  
346 induced glutamate spillover may act via receptors differentially expressed on type 1 and 2  
347 astroglia.

348

#### 349 **Astroglial adaptations are differentially regulated around D1- and D2-MSNs**

350 D1- and D2-MSNs together constitute 90-95% of all NAc core neurons (9) and different astroglial  
351 subpopulations modulate synaptic transmission selectively on one or the other neuronal subtype  
352 (19, 27). Consistent with astroglia associating selectively with one or the other, but not both types  
353 of MSN, astroglia were more proximal to D2- than D1-MSN dendrites in control animals. The  
354 finding that astroglia increased their proximity to D1-MSN synapses after extinction training, but  
355 retracted from D2-MSNs, is consistent with the fact that synaptic adaptations associated with  
356 extinction from addictive drug self-administration are found primarily on D2-MSNs, while  
357 adaptations produced by drug cues are predominant on D1-MSNs (26, 46-48). We predict that  
358 astrocyte insulation of D1-MSNs after extinction training would reduce synaptic glutamate  
359 spillover, extrasynaptic receptor stimulation and ultimately synaptic potentiation of D1-synapses  
360 during extinction, relative to D2-MSNs (26, 48). Moreover since astrocytes can trigger long-term  
361 depression at D1-MSN synapses via mGluR5-dependent ATP/adenosine signaling in the dorsal



362 striatum (19), an increase in astrocyte association with D1-MSN synapses after heroin extinction  
363 may serve to suppress synaptic activity at D1-neurons and to thereby dampen seeking.  
364 Conversely, retraction of astrocytes from D2-MSNs after extinction training is expected to be  
365 permissive of synaptic potentiation at D2-MSN synapses via glutamate spillover. A number of  
366 studies are consistent with this interpretation, including: extinction from cocaine is associated  
367 with synaptic potentiation at D2- but not D1-MSN excitatory synapses (26), matrix  
368 metalloprotease-2 (MMP-2) activity is elevated in heroin extinguished rats only around NAc core  
369 D2-MSN dendritic spines (46), and chemogenetically activating D2-MSNs suppresses drug  
370 seeking (10).

371

372 That astrocyte processes surrounding D1-MSNs retracted during heroin-associated cue exposure  
373 is consistent with permitting glutamate spillover and potentiating synaptic activity at D1-synapses,  
374 as has been reported for both glutamate transmission and spine morphology (i.e. increased spine  
375 head diameter and/or spine density) during cued drug seeking (26, 47). Since astrocytes dampen  
376 synaptic potentiation via a number of mechanisms (20, 40), we hypothesize that increased  
377 astrocyte insulation of D2-MSNs during cue-reinstated heroin seeking may reduce D2-MSN  
378 potentiation relative to the extinguished context (26, 41). However, a number of reports indicate  
379 that subpopulations of D2-MSNs in the striatum promote, rather than inhibit motivated behaviors  
380 (49-52). Moreover, cortical inputs linked to cued reinstatement (53) innervate D2-MSNs to a  
381 greater extent than D1-MSNs (54). For this reason, the possibility remains that increased  
382 astrocyte insulation on D2-MSNs during cued reinstatement may serve a compensatory function  
383 by triggering autoinhibition at cortical terminals that release glutamate in response to heroin-  
384 conditioned cues. In this way, astrocyte insertion onto D2-MSNs may contribute to reducing  
385 glutamate spillover onto both D2-MSNs, as well as D1-MSNs, that receive less direct innervation  
386 by prefrontal terminals (54), but are significantly engaged during cued reinstatement to drive  
387 seeking (26).

388

389 Akin to astroglial synaptic proximity, surface GLT-1 was lower adjacent to D1- compared with D2-  
390 dendrites in saline rats. However, the overall dynamic in type 2 astroglia after extinction and cued  
391 reinstatement observed in wild-type rats was not recapitulated in either D1- or D2-MSNs. This  
392 could result from increased surface-GLT-1 in type 2 astroglia targeting non-dendritic portions of  
393 D1- and D2-MSNs or targeting subpopulations of interneurons or other astroglia that were not  
394 labeled in D1- and D2-Cre rats.

395

### 396 **Astroglial plasticity during sucrose versus heroin seeking**

397 Sucrose training did not down-regulate GLT-1 nor did it produce changes in synaptic proximity by  
398 NAc core astroglia in any treatment group (6, 55). The relative lack of changes in astroglial  
399 subpopulation plasticity after extinction from sucrose self-administration and cued reinstatement  
400 supports the likelihood that changes in the proportion of astroglial subtypes in heroin trained rats  
401 may be selective for addictive drugs and not natural rewards. Interestingly, although we found no  
402 change in co-registration of GLT-1 with Synapsin I in sucrose-trained or reinstated animals, we  
403 observed reduced surface expression of GLT-1 after extinction from sucrose self-administration  
404 compared to yoked controls, further reducing the proportion of type 2 astroglia in this group. As  
405 described above, we predict that synaptic adjacency of astroglial processes deficient in GLT-1  
406 would favor presynaptic autoinhibition upon transmitter release (36). Consistent with this  
407 hypothesis, sucrose-trained rats exhibit more rapid extinction training and less perseverative  
408 reward seeking compared with drug-trained animals (56, 57), even though during sucrose self-  
409 administration produced more active lever presses than heroin self-administration.

410

### 411 **Implications for treating substance use disorders**

412 We found that astroglia in the NAc core exhibited two forms of plasticity capable of shaping cue-  
413 induced heroin seeking that occurred in separate astroglial subpopulations and were regulated

414 by distinct signaling mechanisms. Moreover, both increasing astroglial proximity to synapses and  
415 glutamate transport involve proteins selectively expressed in astroglia (ezrin and GLT-1,  
416 respectively). The fact that none of the plasticity produced in NAcore astroglia from heroin-trained  
417 rats was recapitulated by sucrose training supports the potential that selective interventions in  
418 one or the other astroglial dynamic may be therapeutically beneficial in treating substance use  
419 disorder. Indeed, pharmacological treatments such as ceftriaxone and N-acetylcysteine that  
420 elevate GLT-1 are effective at reducing drug seeking in rodent models of relapse (58-60) and  
421 reducing drug cue reactivity in humans (61). Unfortunately, while reducing craving induced by  
422 drug cues, N-acetylcysteine has proven only marginally effective at reducing relapse in human  
423 trials (62-64). Given that astroglia engage two distinct processes for dampening cue-induced drug  
424 seeking, and that increasing synaptic adjacency of astroglial processes in the absence of GLT-1  
425 reduces the intensity of relapse, the poor efficacy in relapse prevention by drugs restoring GLT-1  
426 might be improved in combination with drugs that promote synaptic adjacency of NAcore  
427 astroglia.

## 428 **MATERIALS AND METHODS**

### 429 Experimental design and statistical analyses

430 All experiments included groups with  $\geq 4$  animals each to minimize variability due to animal  
431 behavior. All immunohistochemical and imaging procedures using tissue from experimental  
432 groups (i.e. extinguished, reinstated) were conducted alongside yoked controls to minimize the  
433 impact of experimental variability on independent groups. Data were analyzed using GraphPad  
434 Prism and a D'Agostino-Pearson normality test followed by Kruskal-Wallis or Mann-Whitney tests  
435 when one or more groups were not normally distributed. For non-Gaussian datasets, including all  
436 astroglial measures, no outliers were removed and data were plotted with values for each cell  
437 depicted individually and a bar to indicate the group median. Dunn's test was used for post hoc  
438 comparisons. Normally distributed datasets, including all behavioral data, were analyzed using a  
439 1- or 2-way ANOVA or a Student's t-test. To more clearly show median differences in Fig. 6, y-  
440 axes show data  $\leq 2.0\%$  co-registration. Full datasets for Fig. 6 are reported in Table  
441 S1. Cumulative distributions were analyzed using Kolmogorov-Smirnov or  $\chi^2$  and a Bonferroni  
442 correction was applied for multiple comparisons. In all cases,  $p < 0.05$  was considered significant.

443

### 444 Self-administration

445 Experimental procedures involving animals were conducted in accordance with guidelines  
446 established by the Institutional Animal Care and Use Committee at the Medical University of South  
447 Carolina. Operant training was conducted as previously described (6). Briefly, male Sprague  
448 Dawley rats or male and female Long Evans rats (200-250g) were anesthetized with i.m. ketamine  
449 (100 mg/kg) and xylazine (7 mg/kg) and fitted with intrajugular catheters. Rats were trained to  
450 self-administer heroin during 3h sessions for 10d and presses on an active lever were paired with  
451 light and tone cues and i.v. heroin infusion. Animals trained to self-administer sucrose did not  
452 undergo catheter implantation and received sucrose (45 mg, Bio-Serv) in place of heroin along  
453 with cues during self-administration (2h/d). Yoked controls were played cues when a paired rat

454 received heroin or sucrose. Rats yoked to heroin self-administering animals also received i.v.  
455 saline infusions. After self-administration, animals underwent 10-12d of extinction training (3h/d  
456 after heroin, 2h/d after sucrose) where active lever presses yielded no reward or cues.  
457 Extinguished rats and yoked controls were sacrificed 24h after the final extinction session.  
458 Reinstated animals were placed in the operant chamber for 15 or 120m and cues were restored  
459 to the active lever, but no reward was delivered.

460

#### 461 Viral labeling

462 After catheter implantation or 5d before starting sucrose self-administration, rats received  
463 microinjections (1  $\mu$ L/hemisphere, 0.15  $\mu$ L/minute, 5 min diffusion) of a virus driving expression  
464 of membrane-targeted mCherry under control of the GFAP promoter (AAV5/GFAP-hM3dq-  
465 mCherry, University of Zurich, Figs. 1-5 or AAV5/GfaABC1D-Lck-GFP, Addgene, Fig. 6) in the  
466 NAcore (+1.5mm AP,  $\pm$ 1.8mm ML, -7.0mm DV). To label D1- and D2-MSN dendrites, AAV1/CAG-  
467 Flex-Ruby2sm-Flag (Addgene) was co-injected in D1- or D2-Cre rats along with virus used to  
468 label astroglia. Virus incubation occurred over the course of operant training.

469

#### 470 Confocal imaging and image analysis

471 Animals were anesthetized with an overdose of pentobarbital (20 mg i.v. or 100 mg i.p.) and  
472 perfused transcardially with 4% PFA. Brains were incubated overnight in 4% PFA and sliced at  
473 100  $\mu$ m using a vibratome (Thermo Fisher). Slices containing the NAcore were permeabilized in  
474 PBS with 2% Triton X-100 for 1h at room temperature. Non-specific epitope binding was blocked  
475 by incubation in PBS with 0.2% Triton X-100 (PBST) and 2% NGS (block) for 1h at room  
476 temperature before incubation in primary antibodies (rabbit anti-Synapsin I, ab64581, Abcam;  
477 guinea pig anti-GLT-1, ab1783, EMD Millipore; mouse anti-FLAG, F1804, Sigma-Aldrich) at  
478 1:1000 in block for 48h. After washing in PBST, tissue was incubated overnight in biotinylated  
479 anti-guinea pig antibody (BA-7000, Vector Laboratories) in PBST and then overnight in

480 fluorescently-labeled antibodies (Thermo Fisher) in PBST after washing. Tissue was mounted  
481 onto glass slides before imaging with a Leica SP5 laser scanning confocal microscope. All images  
482 were acquired at 63x using an oil immersion objective lens, 1024 x 1024 frame size, 12-bit  
483 resolution, 4-frame averaging and a 1- $\mu$ m step size. Z-stacks were iteratively deconvolved 10  
484 times (Autoquant) and digital analysis of astroglial mCherry or GFP signal intensity relative to  
485 background was used to generate a digital model of each astrocyte (Bitplane Imaris). Rendered  
486 astrocytes were used to mask Synapsin I and GLT-1 or Flag signal that was not co-registered  
487 with the astroglial volume. Co-registration (astrocyte with Synapsin I, astrocyte with GLT-1,  
488 astrocyte with GLT-1 and Synapsin I, astrocyte with Flag and Synapsin I, astrocyte with Flag and  
489 GLT-1) was determined based on thresholded signal intensity in each channel. Voxels containing  
490 signal intensity greater than noise in each channel were determined empirically using the  
491 colocalization module and were used to build a colocalization channel. The surface module was  
492 then used to determine the net volume of co-registered signal. All measures, with the exception  
493 of surface-proximal GLT-1 (Fig. 2C-D, Fig. S1C-D), and synaptic and extrasynaptic GLT-1 (Fig.  
494 2F-G, Fig. SF-G), were normalized to the volume of the astrocyte from which they were generated  
495 to control for changes in astroglial volume (6) and to permit inclusion of astrocytes that were  
496 cropped along the z-axis during imaging. Surface-proximal GLT-1 was determined by excluding  
497 co-registered signal that was within the astrocyte volume, but >250nm (a distance roughly  
498 equivalent to the lateral resolution of the microscope used for imaging) from the membrane and  
499 was normalized to total GLT-1 from the astroglial volume. Synaptic and extrasynaptic GLT-1  
500 values were normalized to surface GLT-1 levels from each astrocyte. In all case, imaging and  
501 analyses were conducted blind to animal treatment.

502

### 503 Principal component analysis and hierarchical clustering

504 To identify astroglial clusters according to synaptic co-registration as percent of astrocyte volume,  
505 and surface-proximal GLT-1 expression as percent of total GLT-1 expression, hierarchical

506 clustering on principal components was computed using R software (R Core Team, 2020)  
507 according to (21). Principal components were computed along the two specified dimensions and  
508 Ward's criterion was applied on selected principal components (Fig. S3). The output dendrogram  
509 was separated along 2 main breaks in the data to form 3 clusters (Fig. S3).

510

#### 511 G<sub>q</sub>-DREADD stimulation

512 AAV5/GFAP-hM3dq-mCherry (University of Zurich) was diluted 1:10 in sterile saline and delivered  
513 to the NAc core (+1.5mm AP, ±1.8mm ML, -7.0mm DV) while rats were under anesthesia for jugular  
514 catheter placement as in (40). This dilution was used, because it produced sufficient astroglial  
515 labeling with little off-target labeling in neurons (Fig. 4A). Viral incubation occurred over the course  
516 of operant training. Twenty-four hours after the last extinction session, rats received CNO (3mg/kg  
517 i.p., Abcam) or vehicle (5% DMSO in sterile saline) 30 minutes prior to perfusion and brain  
518 extraction.

519

#### 520 Vivo-morpholino knockdown

521 After catheter placement, animals were fitted with bilateral cannulae above the NAc core (+1.5mm  
522 AP, ±1.8mm ML, -5.5mm DV). Starting on day 6 of extinction training, animals received infusions  
523 of an ezrin antisense vivo-morpholino oligo (6), a GLT-1 antisense vivo-morpholino oligo (24), or  
524 a control oligo (Gene Tools, Inc.) 1.5mm beyond the base of the guide cannulae (50µmol/L,  
525 1µL/hemisphere, 0.5µL/min) for 3 consecutive days. After 3 additional days of extinction training,  
526 rats underwent cued reinstatement for 15-min prior to sacrifice.

527 **REFERENCES**

- 528 1. P. W. Kalivas, The glutamate homeostasis hypothesis of addiction. *Nat Rev Neurosci*  
529 **10**, 561-572 (2009).
- 530 2. K. P. Lehre, N. C. Danbolt, The number of glutamate transporter subtype molecules at  
531 glutamatergic synapses: chemical and stereological quantification in young adult rat  
532 brain. *J Neurosci* **18**, 8751-8757 (1998).
- 533 3. N. C. Danbolt, Glutamate uptake. *Prog Neurobiol* **65**, 1-105 (2001).
- 534 4. D. J. Roberts-Wolfe, P. W. Kalivas, Glutamate Transporter GLT-1 as a Therapeutic  
535 Target for Substance Use Disorders. *CNS Neurol Disord Drug Targets* **14**, 745-756  
536 (2015).
- 537 5. M. D. Scofield *et al.*, Cocaine Self-Administration and Extinction Leads to Reduced Glial  
538 Fibrillary Acidic Protein Expression and Morphometric Features of Astrocytes in the  
539 Nucleus Accumbens Core. *Biol Psychiatry* **80**, 207-215 (2016).
- 540 6. A. Kruyer, M. D. Scofield, D. Wood, K. J. Reissner, P. W. Kalivas, Heroin Cue-Evoked  
541 Astrocytic Structural Plasticity at Nucleus Accumbens Synapses Inhibits Heroin Seeking.  
542 *Biol Psychiatry*, (2019).
- 543 7. B. M. Siemsen *et al.*, Effects of Methamphetamine Self-Administration and Extinction on  
544 Astrocyte Structure and Function in the Nucleus Accumbens Core. *Neuroscience* **406**,  
545 528-541 (2019).
- 546 8. C. D. Gipson, Y. M. Kupchik, P. W. Kalivas, Rapid, transient synaptic plasticity in  
547 addiction. *Neuropharmacology* **76 Pt B**, 276-286 (2014).
- 548 9. C. R. Gerfen, D. J. Surmeier, Modulation of striatal projection systems by dopamine.  
549 *Annu Rev Neurosci* **34**, 441-466 (2011).
- 550 10. J. A. Heinsbroek *et al.*, Loss of Plasticity in the D2-Accumbens Pallidal Pathway  
551 Promotes Cocaine Seeking. *J Neurosci* **37**, 757-767 (2017).



- 552 11. A. C. Bobadilla *et al.*, Cocaine and sucrose rewards recruit different seeking ensembles  
553 in the nucleus accumbens core. *Mol Psychiatry* **25**, 3150-3163 (2020).
- 554 12. G. D. Stuber *et al.*, Excitatory transmission from the amygdala to nucleus accumbens  
555 facilitates reward seeking. *Nature* **475**, 377-380 (2011).
- 556 13. A. V. Kravitz, L. D. Tye, A. C. Kreitzer, Distinct roles for direct and indirect pathway  
557 striatal neurons in reinforcement. *Nat Neurosci* **15**, 816-818 (2012).
- 558 14. K. Kawaguchi, S. Yoshida, R. Hatano, S. Asano, Pathophysiological Roles of  
559 Ezrin/Radixin/Moesin Proteins. *Biol Pharm Bull* **40**, 381-390 (2017).
- 560 15. M. Lavielle *et al.*, Structural plasticity of perisynaptic astrocyte processes involves ezrin  
561 and metabotropic glutamate receptors. *Proc Natl Acad Sci U S A* **108**, 12915-12919  
562 (2011).
- 563 16. A. Derouiche, K. D. Geiger, Perspectives for Ezrin and Radixin in Astrocytes: Kinases,  
564 Functions and Pathology. *Int J Mol Sci* **20**, (2019).
- 565 17. A. Gautreau, D. Louvard, M. Arpin, Morphogenic effects of ezrin require a  
566 phosphorylation-induced transition from oligomers to monomers at the plasma  
567 membrane. *J Cell Biol* **150**, 193-203 (2000).
- 568 18. A. Derouiche, M. Frotscher, Peripheral astrocyte processes: monitoring by selective  
569 immunostaining for the actin-binding ERM proteins. *Glia* **36**, 330-341 (2001).
- 570 19. A. Cavaccini, C. Durkee, P. Kofuji, R. Tonini, A. Araque, Astrocyte Signaling Gates  
571 Long-Term Depression at Corticostriatal Synapses of the Direct Pathway. *J Neurosci* **40**,  
572 5757-5768 (2020).
- 573 20. C. Durkee, P. Kofuji, M. Navarrete, A. Araque, Astrocyte and neuron cooperation in long-  
574 term depression. *Trends Neurosci* **44**, 837-848 (2021).
- 575 21. F. Husson, J. Josse, J. Pages. (2010).

- 576 22. H. W. Shen, M. D. Scofield, H. Boger, M. Hensley, P. W. Kalivas, Synaptic glutamate  
577 spillover due to impaired glutamate uptake mediates heroin relapse. *J Neurosci* **34**,  
578 5649-5657 (2014).
- 579 23. M. D'Ascenzo *et al.*, mGluR5 stimulates gliotransmission in the nucleus accumbens.  
580 *Proc Natl Acad Sci U S A* **104**, 1995-2000 (2007).
- 581 24. K. J. Reissner *et al.*, Use of vivo-morpholinos for control of protein expression in the  
582 adult rat brain. *J Neurosci Methods* **203**, 354-360 (2012).
- 583 25. R. W. Nall, J. A. Heinsbroek, T. B. Nentwig, P. W. Kalivas, A. C. Bobadilla, Circuit  
584 selectivity in drug versus natural reward seeking behaviors. *J Neurochem* **157**, 1450-  
585 1472 (2021).
- 586 26. D. Roberts-Wolfe, A. C. Bobadilla, J. A. Heinsbroek, D. Neuhofer, P. W. Kalivas, Drug  
587 Refraining and Seeking Potentiate Synapses on Distinct Populations of Accumbens  
588 Medium Spiny Neurons. *J Neurosci* **38**, 7100-7107 (2018).
- 589 27. R. Martin, R. Bajo-Graneras, R. Moratalla, G. Perea, A. Araque, Circuit-specific signaling  
590 in astrocyte-neuron networks in basal ganglia pathways. *Science* **349**, 730-734 (2015).
- 591 28. R. T. LaLumiere, P. W. Kalivas, Glutamate release in the nucleus accumbens core is  
592 necessary for heroin seeking. *J Neurosci* **28**, 3170-3177 (2008).
- 593 29. N. Cholet, L. Pellerin, P. J. Magistretti, E. Hamel, Similar perisynaptic glial localization for  
594 the Na<sup>+</sup>,K<sup>+</sup>-ATPase alpha 2 subunit and the glutamate transporters GLAST and GLT-1  
595 in the rat somatosensory cortex. *Cereb Cortex* **12**, 515-525 (2002).
- 596 30. A. Minelli, P. Barbaresi, R. J. Reimer, R. H. Edwards, F. Conti, The glial glutamate  
597 transporter GLT-1 is localized both in the vicinity of and at distance from axon terminals  
598 in the rat cerebral cortex. *Neuroscience* **108**, 51-59 (2001).
- 599 31. P. Michaluk, J. P. Heller, D. A. Rusakov, Rapid recycling of glutamate transporters on  
600 the astroglial surface. *Elife* **10**, (2021).

- 601 32. C. Murphy-Royal *et al.*, Surface diffusion of astrocytic glutamate transporters shapes  
602 synaptic transmission. *Nat Neurosci* **18**, 219-226 (2015).
- 603 33. H. Shen, K. Moussawi, W. Zhou, S. Toda, P. W. Kalivas, Heroin relapse requires long-  
604 term potentiation-like plasticity mediated by NMDA2b-containing receptors. *Proc Natl*  
605 *Acad Sci U S A* **108**, 19407-19412 (2011).
- 606 34. J. P. Heller, D. A. Rusakov, Morphological plasticity of astroglia: Understanding synaptic  
607 microenvironment. *Glia* **63**, 2133-2151 (2015).
- 608 35. A. Dvorzhak, N. Helassa, K. Torok, D. Schmitz, R. Grantyn, Single Synapse Indicators of  
609 Impaired Glutamate Clearance Derived from Fast iGlu u Imaging of Cortical Afferents in  
610 the Striatum of Normal and Huntington (Q175) Mice. *J Neurosci* **39**, 3970-3982 (2019).
- 611 36. K. P. Lehre, D. A. Rusakov, Asymmetry of glia near central synapses favors  
612 presynaptically directed glutamate escape. *Biophys J* **83**, 125-134 (2002).
- 613 37. D. Dietrich, T. Kral, H. Clusmann, M. Friedl, J. Schramm, Presynaptic group II  
614 metabotropic glutamate receptors reduce stimulated and spontaneous transmitter  
615 release in human dentate gyrus. *Neuropharmacology* **42**, 297-305 (2002).
- 616 38. J. M. Bossert, S. M. Gray, L. Lu, Y. Shaham, Activation of group II metabotropic  
617 glutamate receptors in the nucleus accumbens shell attenuates context-induced relapse  
618 to heroin seeking. *Neuropsychopharmacology* **31**, 2197-2209 (2006).
- 619 39. J. Peters, P. W. Kalivas, The group II metabotropic glutamate receptor agonist,  
620 LY379268, inhibits both cocaine- and food-seeking behavior in rats.  
621 *Psychopharmacology (Berl)* **186**, 143-149 (2006).
- 622 40. M. D. Scofield *et al.*, Gq-DREADD Selectively Initiates Glial Glutamate Release and  
623 Inhibits Cue-induced Cocaine Seeking. *Biol Psychiatry* **78**, 441-451 (2015).
- 624 41. C. Henneberger *et al.*, LTP Induction Boosts Glutamate Spillover by Driving Withdrawal  
625 of Perisynaptic Astroglia. *Neuron* **108**, 919-936 e911 (2020).

- 626 42. A. C. Smith *et al.*, Synaptic plasticity mediating cocaine relapse requires matrix  
627 metalloproteinases. *Nat Neurosci* **17**, 1655-1657 (2014).
- 628 43. A. C. W. Smith *et al.*, Accumbens nNOS Interneurons Regulate Cocaine Relapse. *J*  
629 *Neurosci* **37**, 742-756 (2017).
- 630 44. H. Chai *et al.*, Neural Circuit-Specialized Astrocytes: Transcriptomic, Proteomic,  
631 Morphological, and Functional Evidence. *Neuron* **95**, 531-549 e539 (2017).
- 632 45. E. Aronica *et al.*, Expression and functional role of mGluR3 and mGluR5 in human  
633 astrocytes and glioma cells: opposite regulation of glutamate transporter proteins. *Eur J*  
634 *Neurosci* **17**, 2106-2118 (2003).
- 635 46. V. C. Chioma *et al.*, Heroin Seeking and Extinction From Seeking Activate Matrix  
636 Metalloproteinases at Synapses on Distinct Subpopulations of Accumbens Cells. *Biol*  
637 *Psychiatry*, (2020).
- 638 47. C. Garcia-Keller *et al.*, Relapse-Associated Transient Synaptic Potentiation Requires  
639 Integrin-Mediated Activation of Focal Adhesion Kinase and Cofilin in D1-Expressing  
640 Neurons. *J Neurosci* **40**, 8463-8477 (2020).
- 641 48. A. C. Bobadilla *et al.*, Corticostriatal plasticity, neuronal ensembles, and regulation of  
642 drug-seeking behavior. *Prog Brain Res* **235**, 93-112 (2017).
- 643 49. A. Kruyer *et al.*, Accumbens D2-MSN hyperactivity drives antipsychotic-induced  
644 behavioral supersensitivity. *Mol Psychiatry*, (2021).
- 645 50. C. Soares-Cunha *et al.*, Activation of D2 dopamine receptor-expressing neurons in the  
646 nucleus accumbens increases motivation. *Nat Commun* **7**, 11829 (2016).
- 647 51. C. Soares-Cunha *et al.*, Nucleus accumbens medium spiny neurons subtypes signal  
648 both reward and aversion. *Mol Psychiatry* **25**, 3241-3255 (2020).
- 649 52. Y. Yao *et al.*, Projections from D2 Neurons in Different Subregions of Nucleus  
650 Accumbens Shell to Ventral Pallidum Play Distinct Roles in Reward and Aversion.  
651 *Neurosci Bull* **37**, 623-640 (2021).

- 652 53. P. W. Kalivas, Addiction as a pathology in prefrontal cortical regulation of corticostriatal  
653 habit circuitry. *Neurotox Res* **14**, 185-189 (2008).
- 654 54. M. A. Deroche, O. Lassalle, L. Castell, E. Valjent, O. J. Manzoni, Cell-Type- and  
655 Endocannabinoid-Specific Synapse Connectivity in the Adult Nucleus Accumbens Core.  
656 *J Neurosci* **40**, 1028-1041 (2020).
- 657 55. F. Alasmari, R. L. Bell, P. S. S. Rao, A. M. Hammad, Y. Sari, Peri-adolescent drinking of  
658 ethanol and/or nicotine modulates astroglial glutamate transporters and metabotropic  
659 glutamate receptor-1 in female alcohol-preferring rats. *Pharmacol Biochem Behav* **170**,  
660 44-55 (2018).
- 661 56. A. Kruyer, D. Dixon, A. Angelis, D. Amato, P. W. Kalivas, Astrocytes in the ventral  
662 pallidum extinguish heroin seeking through GAT-3 upregulation and morphological  
663 plasticity at D1-MSN terminals. *Mol Psychiatry*, (2021).
- 664 57. R. Martin-Fardon, F. Weiss, Perseveration of craving: effects of stimuli conditioned to  
665 drugs of abuse versus conventional reinforcers differing in demand. *Addict Biol* **22**, 923-  
666 932 (2017).
- 667 58. L. A. Knackstedt, R. I. Melendez, P. W. Kalivas, Ceftriaxone restores glutamate  
668 homeostasis and prevents relapse to cocaine seeking. *Biol Psychiatry* **67**, 81-84 (2010).
- 669 59. K. J. Reissner *et al.*, Glutamate transporter GLT-1 mediates N-acetylcysteine inhibition  
670 of cocaine reinstatement. *Addict Biol* **20**, 316-323 (2015).
- 671 60. W. Zhou, P. W. Kalivas, N-acetylcysteine reduces extinction responding and induces  
672 enduring reductions in cue- and heroin-induced drug-seeking. *Biol Psychiatry* **63**, 338-  
673 340 (2008).
- 674 61. M. S. Duailibi *et al.*, N-acetylcysteine in the treatment of craving in substance use  
675 disorders: Systematic review and meta-analysis. *Am J Addict* **26**, 660-666 (2017).
- 676 62. E. A. Woodcock, L. H. Lundahl, D. Khatib, J. A. Stanley, M. K. Greenwald, N-  
677 acetylcysteine reduces cocaine-seeking behavior and anterior cingulate

- 678 glutamate/glutamine levels among cocaine-dependent individuals. *Addict Biol*, e12900  
679 (2020).
- 680 63. K. M. Gray *et al.*, A double-blind randomized controlled trial of N-acetylcysteine in  
681 cannabis-dependent adolescents. *Am J Psychiatry* **169**, 805-812 (2012).
- 682 64. S. L. Amen *et al.*, Repeated N-acetyl cysteine reduces cocaine seeking in rodents and  
683 craving in cocaine-dependent humans. *Neuropsychopharmacology* **36**, 871-878 (2011).

684 **ACKNOWLEDGEMENTS**

685 **Funding:** This work was supported by the National Institutes of Health (DA007288 and  
686 DA044782, AK; DA003906 and DA012513, PWK) and the National Science Foundation (OIA  
687 1539034, PWK).

688

689 **Author contributions:** A.K. and P.W.K. designed and interpreted the study and wrote the paper.  
690 A.K. conducted experiments with assistance from A.A. and C.G-K. H.L. performed PCA on  
691 astrocyte data generated by A.K.

692

693 **Competing interests:** The authors declare no competing financial interests.

694

695 **Data and materials availability:** All data are available within the main text or the supplementary  
696 material.

697

698 **FIGURES AND LEGENDS**

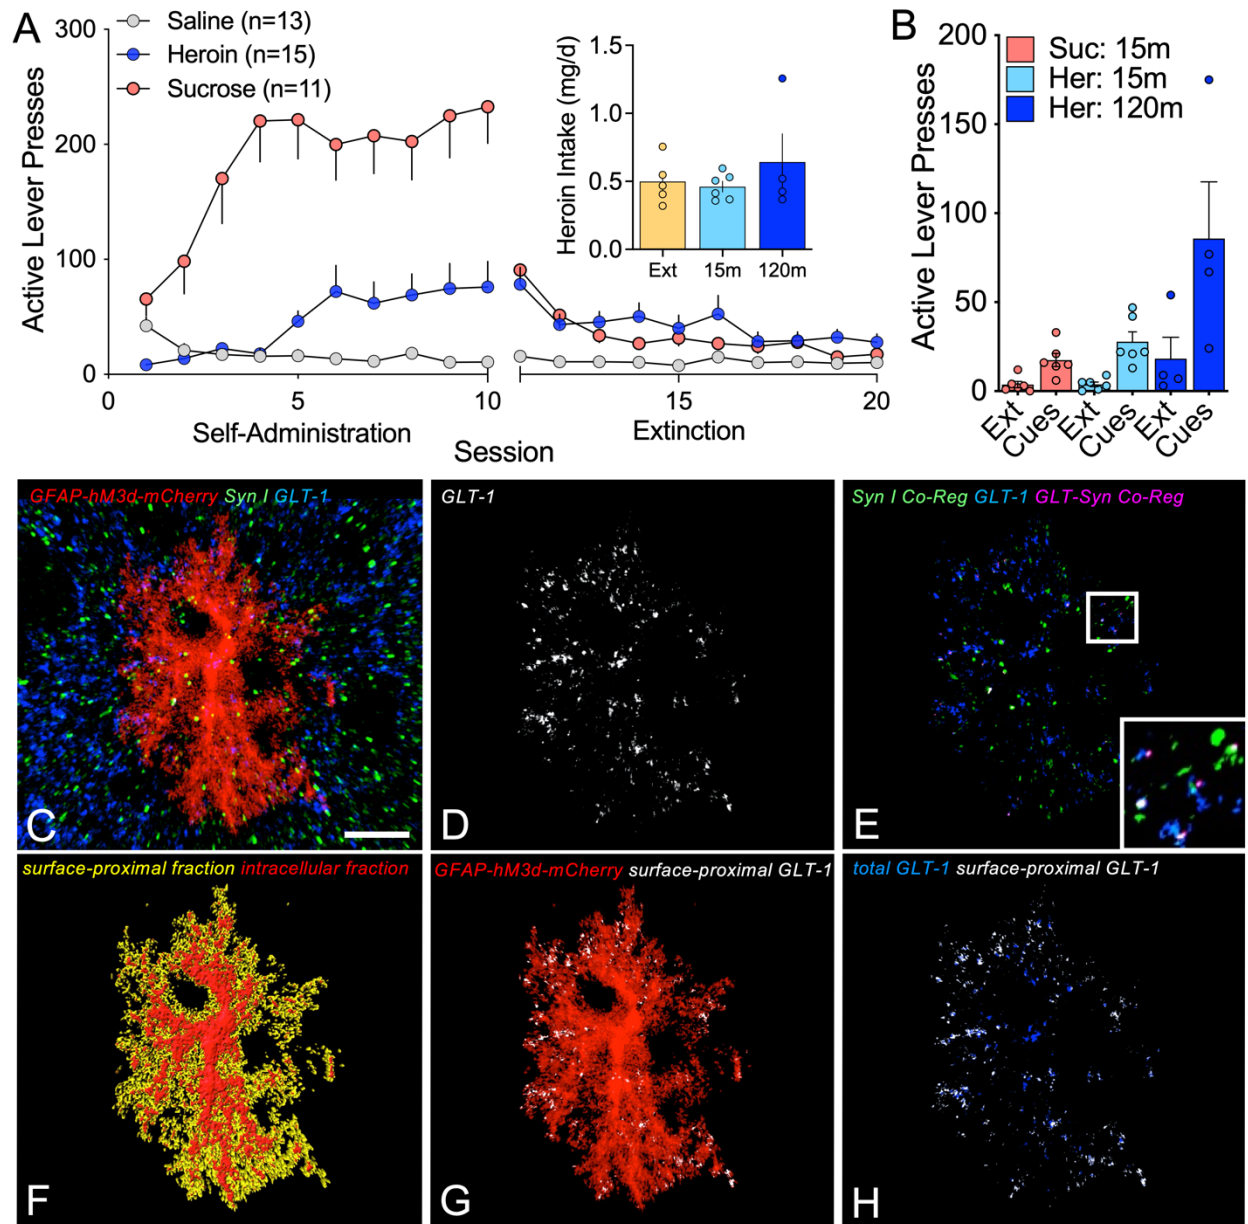

699

700 **Fig. 1. Workflow used for confocal analysis of astroglial morphology and surface-proximal**

701 **GLT-1. (A)** Rats were trained to self-administer heroin or sucrose over 10 consecutive days of

702 operant training and reward delivery was paired with light and tone cues. During extinction

703 training, heroin or sucrose and cues were not delivered in response to active lever pressing and

704 operant responding gradually decreased. Heroin- and sucrose-trained rats differed in active lever

705 pressing during self-administration (2-way ANOVA,  $F_{1,124}=33.44$ ,  $p<0.0001$ ). Inset shows that



706 groups of heroin-trained animals took similar amounts of heroin (1-way ANOVA  $F_{2,12}=0.9187$ ,  
707  $p=0.4984$ ). **(B)** 24h after the last extinction session, reinstated animals were placed in the operant  
708 chamber and cues were restored to the active lever for 15- or 120-min to reinstate seeking (2-  
709 way ANOVA Session  $F_{1,26}=16.07$ ,  $p=0.0005$ ). **(C)** Z-series depicting an NAcore astrocyte  
710 transfected with AAV5/GFAP-hM3d-mCherry (red) and immuno-labeled for Synapsin I (green)  
711 and GLT-1 (blue). **(D)** GLT-1 immunoreactivity co-registered with mCherry in **(C)** is shown in  
712 white. **(E)** Co-registration of GLT-1 (blue) with Synapsin I (green) from the region occupied by the  
713 astrocyte in **(C)** is shown in pink. **(F)** Digital rendering of the astroglial surface (yellow) was used  
714 to identify GLT-1 signal within 250 nm of the cell membrane (**G-H**, white) relative to total GLT-1  
715 from the same astrocyte (**H**, blue). Bar in **(C)**= 10  $\mu\text{m}$ . In **(A**, inset), Ext, extinguished; 15m, 15-  
716 min cued reinstatement; 120m, 120-min cued reinstatement. In **(B)**, Suc, sucrose; Her, heroin;  
717 Ext, extinction.

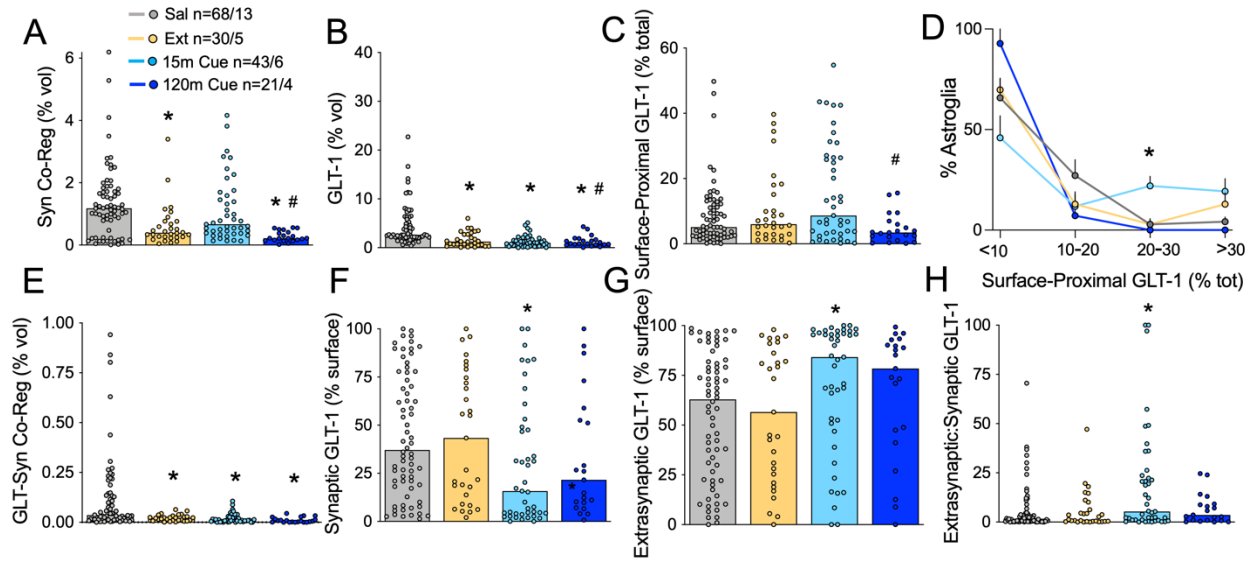

718

719 **Fig. 2. Extrasyaptic GLT-1 was transiently elevated during heroin seeking.** We previously

720 found that co-registration of labeled NAc core astroglia with Synapsin I is reduced during extinction

721 from heroin (A, Kruskal-Wallis=30.17,  $p < 0.0001$ ) and that 15-min of cued heroin seeking restores

722 synaptic insulation by astrocytes. (B) Withdrawal from heroin self-administration produced a

723 downregulation of GLT-1 on NAc core astroglia, whether or not rats were reinstated (Kruskal-

724 Wallis=51.77,  $p < 0.0001$ ). (C) Surface-proximal GLT-1, shown here as percent of total GLT-1 from

725 each astrocyte, was increased during active seeking (15m Cue) when compared to a timepoint at

726 which cues no longer evoke seeking (i.e. cue extinction; 120m Cue, Kruskal-Wallis=9.848,

727  $p < 0.05$ ). A greater proportion of astrocytes exhibited high levels of surface-proximal GLT-1 after

728 15-min of heroin cues compared to yoked saline controls (D, 2-way ANOVA,  $F_{6,48}=2.904$ ,  $p < 0.05$ ).

729 Co-registration of GLT-1 with the presynaptic marker Synapsin I was found to be reduced in

730 heroin-trained rats, and was not restored during cued reinstatement (E, Kruskal-Wallis=35.48,

731  $p < 0.0001$ ). When synaptic and extrasynaptic fractions of surface GLT-1 were analyzed

732 separately, we found that 15-min of cued heroin seeking decreased synaptic GLT-1 (F, Kruskal-

733 Wallis=9.493,  $p < 0.05$ ) and increased extrasynaptic GLT-1 (G, Kruskal-Wallis=9.493,  $p < 0.05$ ).

734 The ratio of extrasynaptic and synaptic GLT-1 illustrates the robust increase in extrasynaptic GLT-

735 1 during cued heroin seeking (H, Kruskal-Wallis=9.476). N shown in (A) as cells/animals. \* $p < 0.05$

736 compared to yoked control, #p<0.05 compared to 15-min reinstated using Dunn's test. Sal, yoked  
737 saline; Ext, extinguished; 15m Cue, 15-min cued reinstatement; 120m Cue, 120-min cued  
738 reinstatement.

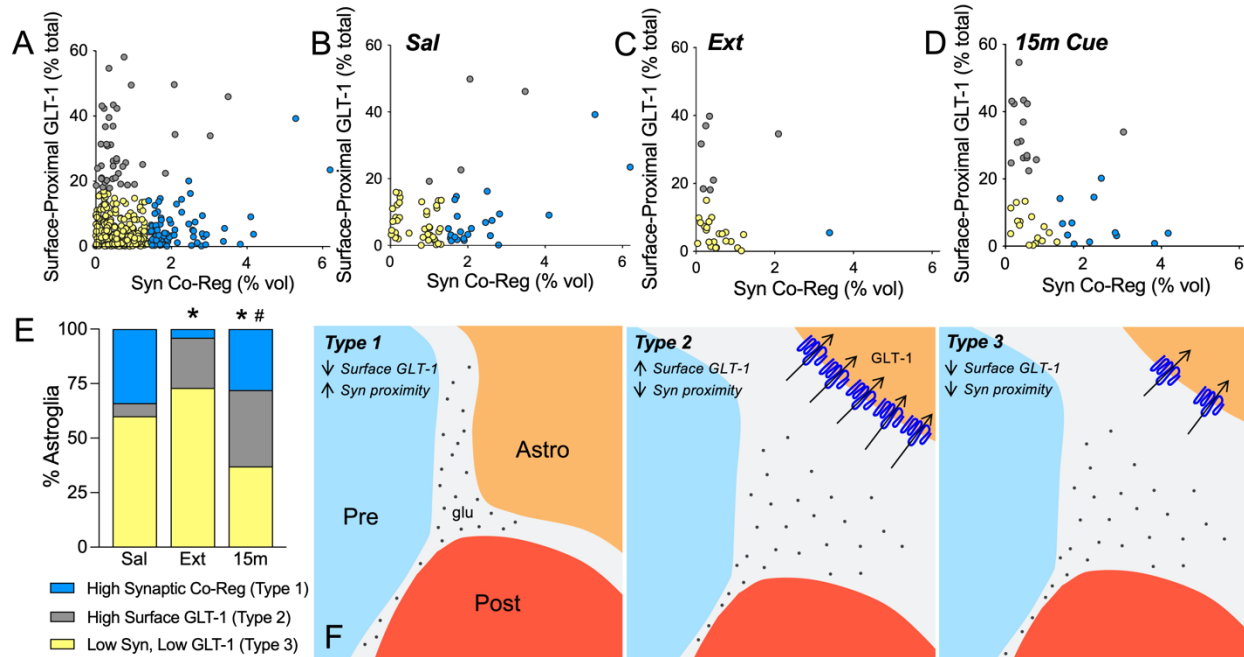

739

740 **Fig. 3. Cue-induced increases in astrocyte motility and GLT-1 surface expression occurred**

741 **in different astroglial subpopulations. (A)** Principal component analysis was used to identify

742 subpopulations of NAcore astroglia according to their synaptic adjacency and levels of surface-

743 proximal GLT-1. Astrocytes with high synaptic adjacency (blue) or high levels of surface-

744 proximal GLT-1 (gray) were identified as separate cell clusters. Distribution of clusters in tissue from yoked

745 saline, extinguished or cue-reinstated rats is shown in (B-D). Astrocytes with high surface-

746 proximal GLT-1, but low synaptic co-registration were largely absent from yoked control rats, but

747 emerged after operant heroin training (E,  $\text{Chi}^2=14.10$  \* $p=0.0018$  Ext. vs. Sal).

748 Half of astroglia in cue-reinstated rats exhibited one or the other type of transient plasticity (E,  $\text{Chi}^2=15.97$ , \* $p=0.0006$

749 vs. Sal;  $\text{Chi}^2=11.20$ , # $p=0.0074$  vs. Ext).

750 (F) Schematic illustrating 3 astroglial subtypes identified

751 by PCA. Type 1 astroglia expressed low levels of GLT-1, but exhibited high measures of synaptic-

752 adjacency (F, left panel). Type 2 astroglia expressed high levels of largely extrasynaptic GLT-1

753 (blue) and were observed heroin training, but were not abundant in control animals (F, middle

754 panel). Type 3 astroglia were predominant in control animals and had low-to-moderate GLT-1

755 expression and synaptic adjacency (F, right panel).

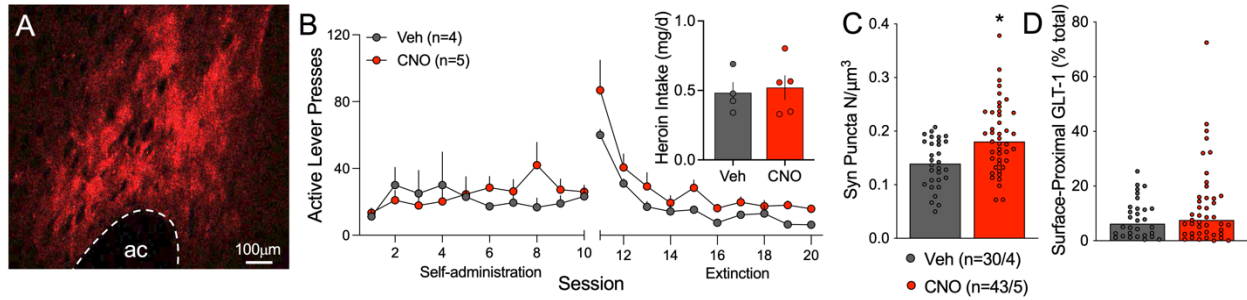

755

756 **Fig. 4. G<sub>q</sub>-signaling increased synaptic adjacency in NAc core astroglia from heroin-trained**

757 **rats.** After viral delivery of G<sub>q</sub>-DREADD in NAc core astroglia (A, red), rats were trained to self-

758 administer heroin before undergoing extinction training (B). The following day, rats received i.p.

759 injections of vehicle or CNO, but did not undergo cued reinstatement. Heroin intake did not differ

760 between vehicle- or CNO-treated rats (B, inset,  $t_{7}=0.173$ ,  $p=0.7602$ ). (C) G<sub>q</sub> signaling increased

761 co-registration of NAc core astroglia with near-adjacent immunolabeled Synapsin I puncta (Mann-

762 Whitney  $U=363$ ,  $p=0.0013$ ), but did not impact levels of surface-proximal GLT-1 (D, Mann-

763 Whitney  $U=568$ ,  $p=0.3934$ ). In (A), ac, anterior commissure. In (B-C), Veh, Vehicle. In (C), N

764 shown as cells/animals.

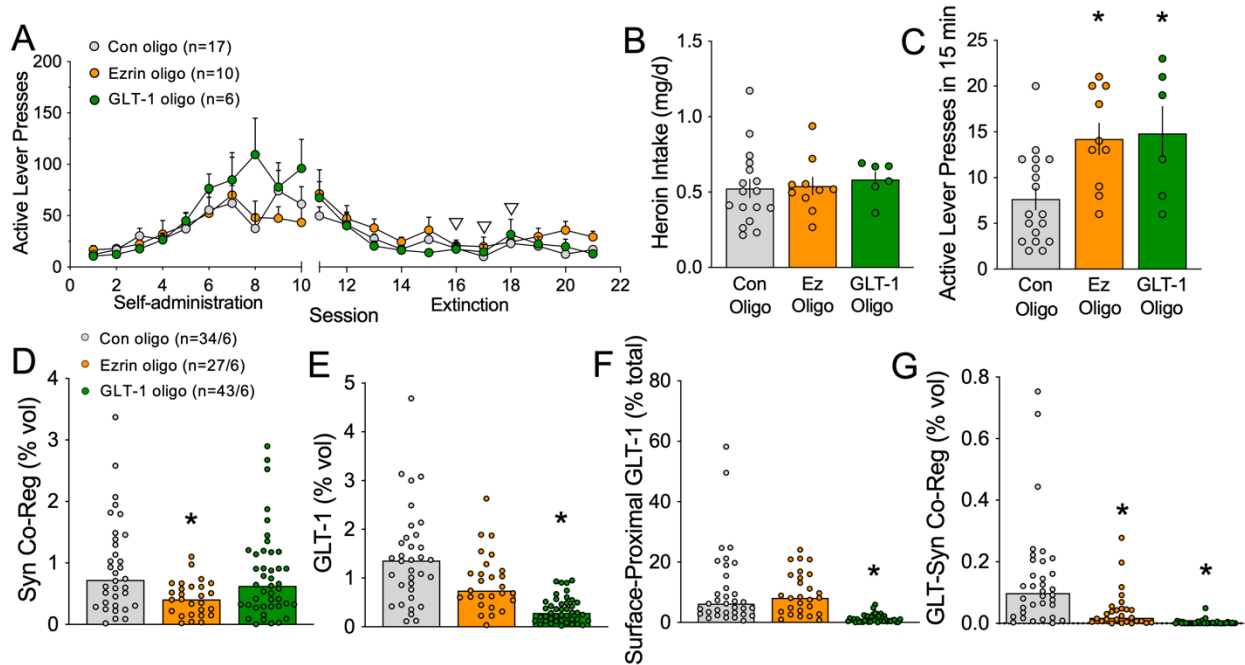

765

766 **Fig. 5. Impairing cue-induced astrocyte motility or surface GLT-1 elevated heroin seeking.**

767 (A) Rats were trained to self-administer heroin over 10 consecutive days. Starting on day 6 of  
768 extinction training for 3 consecutive days (white arrowheads), animals received NAcore infusions  
769 of an ezrin antisense oligomer, a GLT-1 antisense oligomer or a control oligomer. Animals in each  
770 treatment group did not differ in total heroin intake during self-administration. (B) Rats receiving  
771 different oligo treatments did not differ in heroin intake (1-way ANOVA  $F_{2,30}=0.1739$ ,  $p=0.8412$ ).  
772 24h after the final extinction session, animals were reinstated for 15-min by exposure to light and  
773 tone cues previously paired with heroin delivery. (C) Rats that underwent ezrin or GLT-1  
774 knockdown pressed higher on the active lever during the 15-min reinstatement session (1-way  
775 ANOVA  $F_{2,30}=6.230$ ,  $p=0.0055$ ,  $*p=0.0058$  Con vs. Ezrin Oligo,  $*p=0.0104$  Con vs. GLT-1 Oligo  
776 using Fisher's test). (D) Astrocytes from rats treated with the ezrin oligo exhibited a significant  
777 reduction in synaptic co-registration, consistent with knockdown of astrocyte peripheral process  
778 motility (Kruskal-Wallis=15.85,  $p=0.0004$ ,  $*p=0.0002$  vs. Con). The GLT-1 oligo did not impact  
779 synaptic co-registration by NAcore astroglia ( $p=0.4676$  vs. Con). (E) GLT-1 levels were  
780 unchanged by ezrin antisense oligo delivery ( $p=0.3888$ ), but were reduced by treatment with the

781 GLT-1 oligo (Kruskal-Wallis=54.85,  $p < 0.0001$ ,  $*p < 0.0001$ ). (**F**) Likewise, surface-proximal GLT-1  
782 was reduced after application of the GLT-1 oligo (Kruskal-Wallis=80.22,  $p < 0.0001$ ,  $*p < 0.0001$  vs.  
783 Con), but not the ezrin oligo ( $p > 0.9999$  vs. Con). (**G**) The co-registration between GLT-1 and  
784 Synapsin I on astroglia was significantly reduced after ezrin (Kruskal-Wallis=87.13,  $p < 0.0001$ ,  
785  $*p = 0.0147$ ) or GLT-1 knockdown ( $*p < 0.0001$ ). In (**A-D**), Con, control oligo; Ez, ezrin oligo; GLT-  
786 1, GLT-1 oligo. In (**D**), N shown as cells/animals.

787



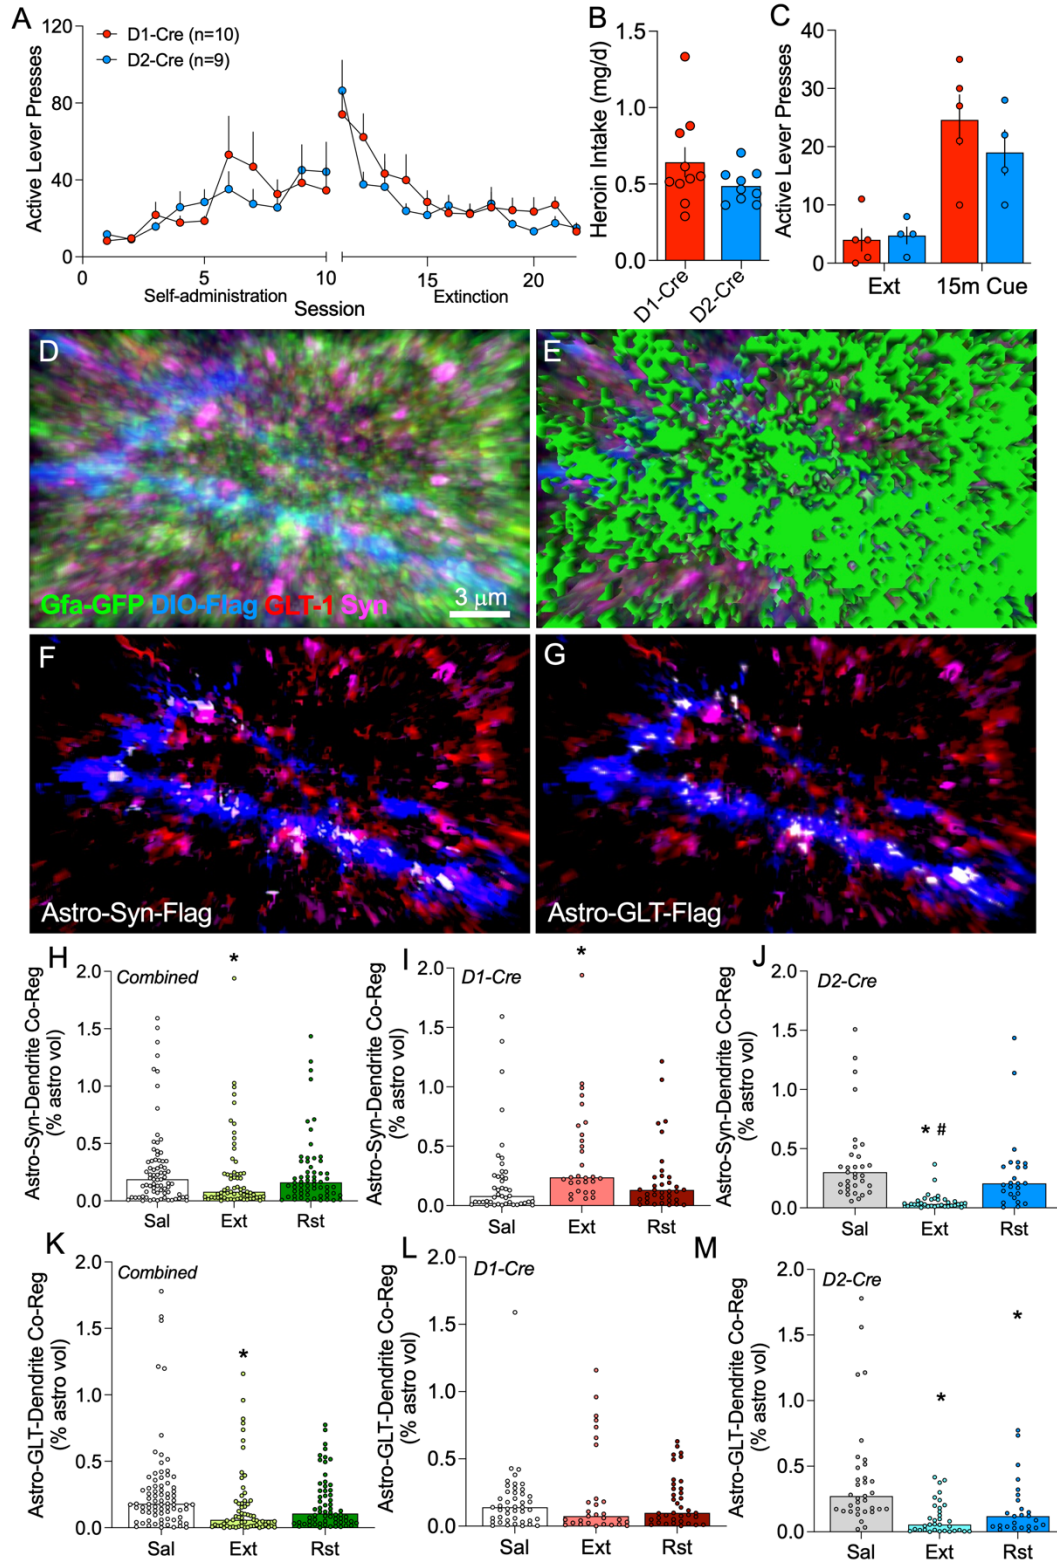

788

789 **Fig. 6. Astrocytes increased their adjacency to D1-MSN synapses but retracted from D2-**

790 **MSN synapses after extinction training. (A) Male and female D1- and D2-Cre rats were trained**



791 to self-administer heroin over 10 days before undergoing extinction training. **(B)** Heroin intake did  
792 not differ between the strains ( $t_{17}=1.449$ ,  $p=0.1656$ ). **(C)** 24h after the last extinction session, lever  
793 pressing was reinstated by exposure to heroin-conditioned cues for 15-min (2-way ANOVA Time  
794  $F_{1,7}=20.36$   $p=0.0028$ , Genotype  $F_{1,7}=0.9944$   $p=0.3519$ ). **(D)** NAcCore tissue from these animals  
795 was immunolabeled to identify D1- or D2-MSN dendrites (blue), GLT-1 (red), and Synapsin I  
796 (pink). Signal associated with NAcCore astroglia (green, **D-E**) was isolated to quantify the degree  
797 of triple co-registration between astroglia and D1- or D2-MSN synapses (**F**, white), or astroglial  
798 GLT-1 and D1- or D2-MSN dendrites (**G**, white). Synaptic association by astroglia was reduced  
799 by extinction training after heroin self-administration when quantified in a cell-nonspecific manner  
800 (**H**, Kruskal-Wallis=4.617  $p=0.0994$ , \* $p=0.0380$  vs. Sal). When analyzed separately, astrocyte  
801 association with D1-MSN synapses was low at baseline and was increased by extinction training  
802 (**I**, Kruskal-Wallis=12.35  $p=0.0021$ , \* $p=0.0014$  vs. Sal). Instead, D2-MSN synapses had high  
803 astrocyte insulation at baseline ( $p<0.0001$  vs. D1-Cre, Sal using Dunn's test) that was reduced  
804 by extinction training and recovered during cued reinstatement (**J**, Kruskal-Wallis=45.84  
805  $p<0.0001$ , \* $p<0.0001$  vs. Sal, # $p<0.0001$  vs. Rst). Surface-proximal, dendrite-associated GLT-1  
806 was decreased overall after extinction training in NAcCore astrocytes, and was restored during 15-  
807 min cued reinstatement (**K**, Kruskal-Wallis=15.23  $p=0.0005$ , \* $p<0.05$  vs. Sal). However, the  
808 increase in surface-proximal GLT-1 during cued reinstatement was not associated with dendrites  
809 from D1- (**L**, Kruskal-Wallis=0.7498  $p=0.6874$ ), or D2-MSNs (**M**, Kruskal-Wallis=25.49  $p<0.0001$ ,  
810 \* $p<0.05$  vs. Sal). Like astrocyte-synaptic adjacency, GLT-1 co-registration with D2-dendrites was  
811 higher at baseline compared with D1-dendrites ( $p=0.0043$  using Dunn's test). In (**I-J**, **L-M**),  $N=25$ -  
812 44/4-5 cells/animals per group and full data spread is reported in Table S2. Sal, yoked saline; Ext,  
813 extinguished; Rst, 15-min cued reinstatement.

## 1 SUPPLEMENTARY MATERIAL

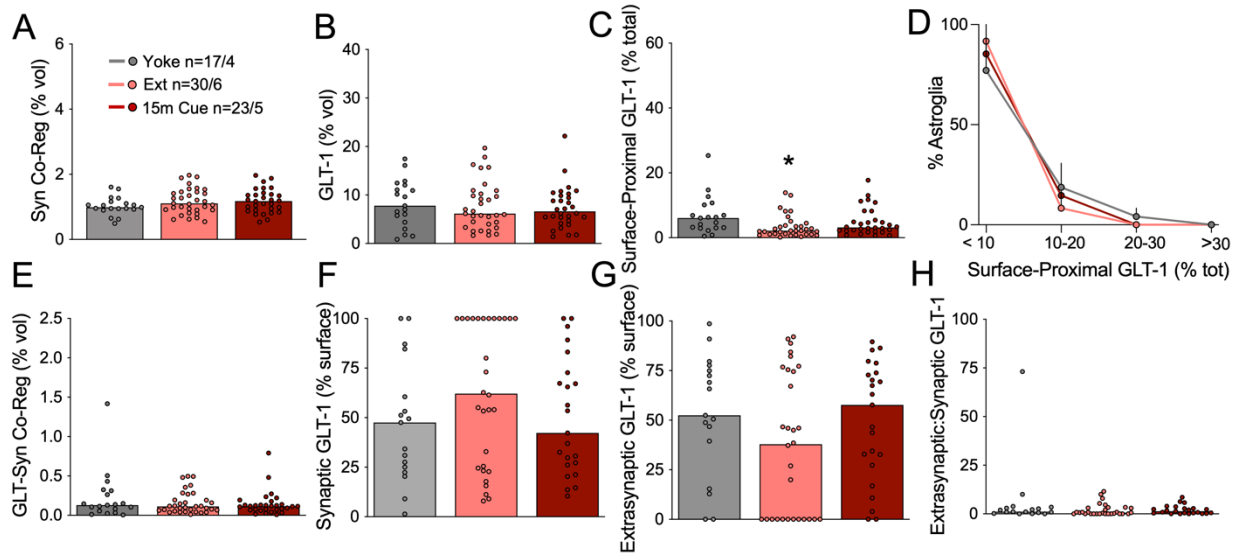

2  
3 **Fig. S1. Astrocyte motility and GLT-1 expression were unchanged during reinstated**  
4 **sucrose seeking.** Co-registration of labeled NAcore astroglia with Synapsin I was not changed  
5 after extinction of sucrose self-administration or during 15-min of cue-reinstated sucrose seeking  
6 (A, Kruskal-Wallis=2.153,  $p=0.341$ ). (B) GLT-1 expression was unchanged after operant training  
7 with sucrose (Kruskal-Wallis=0.7336,  $p=0.693$ ). (C) Surface-proximal GLT-1, shown as percent  
8 of total GLT-1 from each astrocyte, was reduced after extinction from sucrose self-administration  
9 (Kruskal-Wallis=8.056,  $p<0.05$ ). (D) Cued reinstatement of sucrose seeking did not change the  
10 proportion of astroglia expressing high levels of surface-proximal GLT-1 (2-way ANOVA,  
11  $F_{6,36}=0.469$ ,  $p=0.827$ ). (E) Co-registration of GLT-1 with the presynaptic marker Synapsin I was  
12 not changed by sucrose training (Kruskal-Wallis=0.3724,  $p=0.830$ ). When synaptic (F, Kruskal-  
13 Wallis=2.950) and extrasynaptic (G, Kruskal-Wallis=2.950) fractions of surface GLT-1 were  
14 analyzed separately, we found no change in sucrose-trained rats compared with yoked controls.  
15 (H) shows ratio of extrasynaptic:synaptic GLT-1 (Kruskal-Wallis=2.950). N shown in (A) as  
16 cells/animals. \* $p<0.05$  compared to yoked control using Dunn's test. Yoked, yoked cues; Ext,  
17 extinguished; 15m Cue, 15-min cued reinstatement.

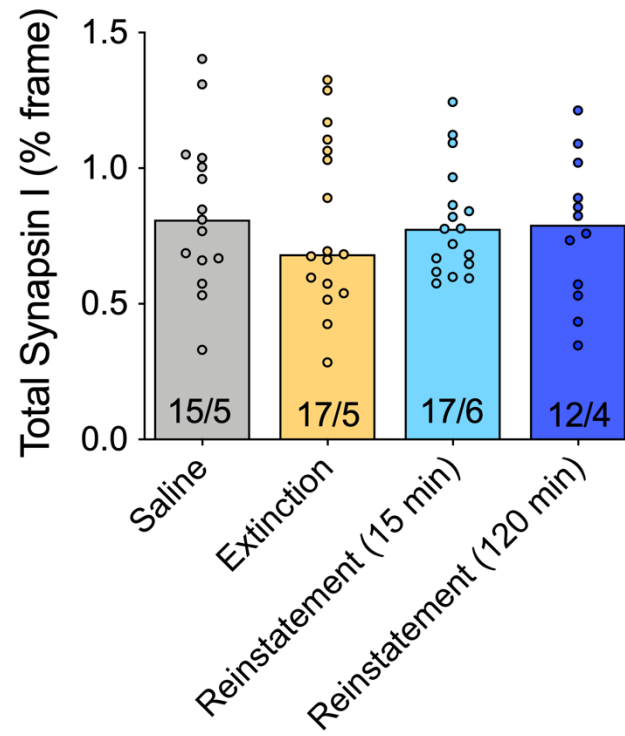

18

19 **Fig. S2. Heroin self-administration and extinction training did not impact Synapsin I**  
20 **immunoreactivity in the NAc core.** Kruskal-Wallis=0.4046, p=0.9393. N shown in bars as  
21 frames/animal.

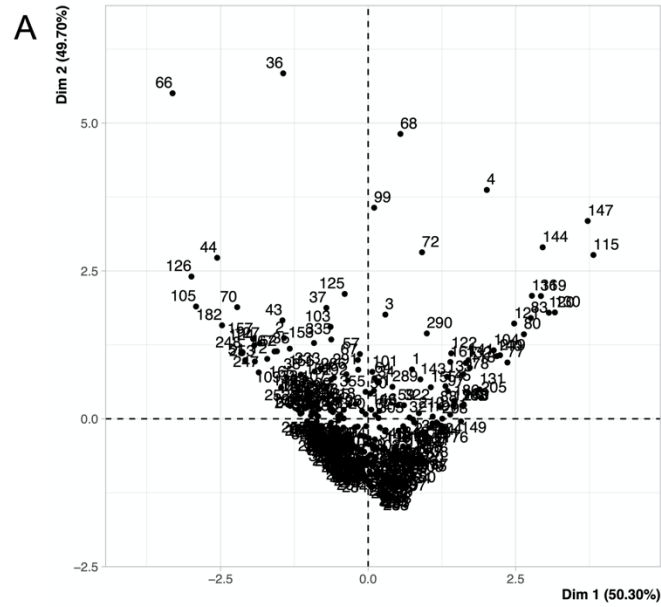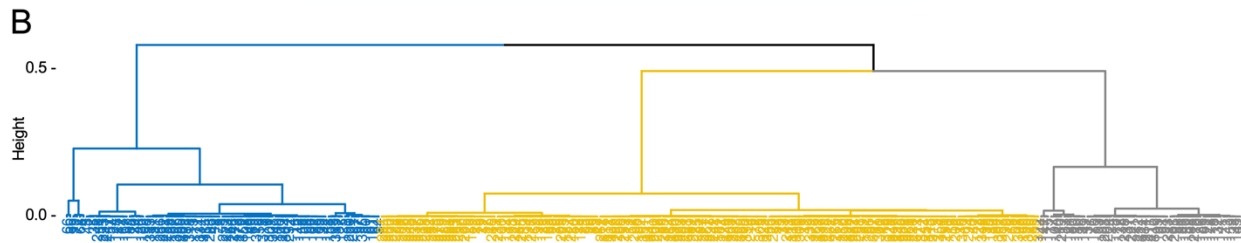

22  
23 **Fig. S3. (A)** Principal component analysis showing individual data points organized according to  
24 dimensions 1 and 2, which account for 50.3% and 49.7% of the data variance, respectively. **(B)**  
25 Dendrogram shows three clusters representing type 1 (blue), type 2 (gray), and type 3 (yellow)  
26 astroglia.

27

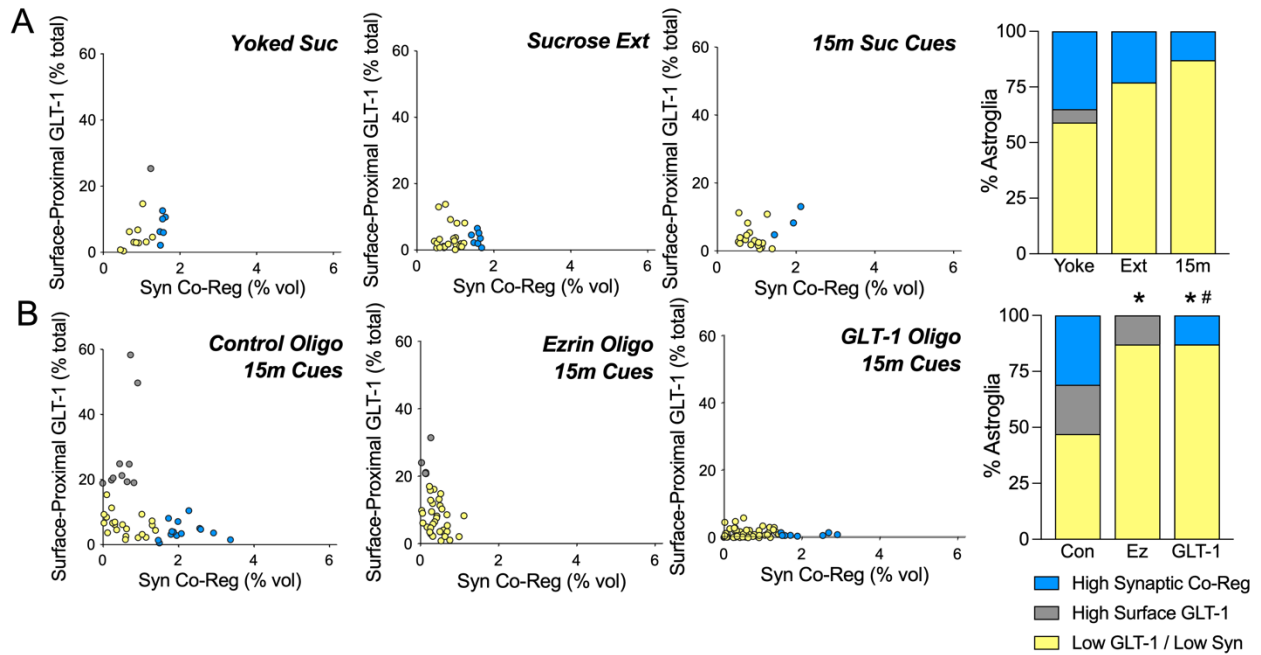

28

29 **Fig. S4. Astroglial subpopulations are not altered by operant training with sucrose, but are**

30 **abolished by ezrin or GLT-1 oligo treatment. (A)** Astroglial clusters are not altered by operant

31 training with sucrose ( $\text{Chi}^2=2.818$   $p=0.2444$  Yoke vs. Ext,  $\text{Chi}^2=4.535$   $p=0.1036$  Yoke vs. 15m).

32 **(B)** Compared with astroglial subpopulations during reinstatement after control oligo treatment

33 (left), ezrin or GLT-1 oligo treatment abolished subpopulations characterized by high synaptic

34 adjacency (blue) or high surface-proximal GLT-1 (gray), respectively ( $\text{Chi}^2=17.87$   $*p=0.0002$  Ez

35 vs. Con,  $\text{Chi}^2=23.60$   $*p<0.001$  GLT-1 vs. Con,  $\text{Chi}^2=13.01$   $\#p=0.003$  GLT-1 vs. Ez). In **(A, right**

36 panel), Yoke, yoked cues; Ext, extinguished; 15m, 15-min cued reinstatement. In **(B, right panel),**

37 Con, control oligo; Ez, ezrin oligo; GLT-1, GLT-1 oligo.

38

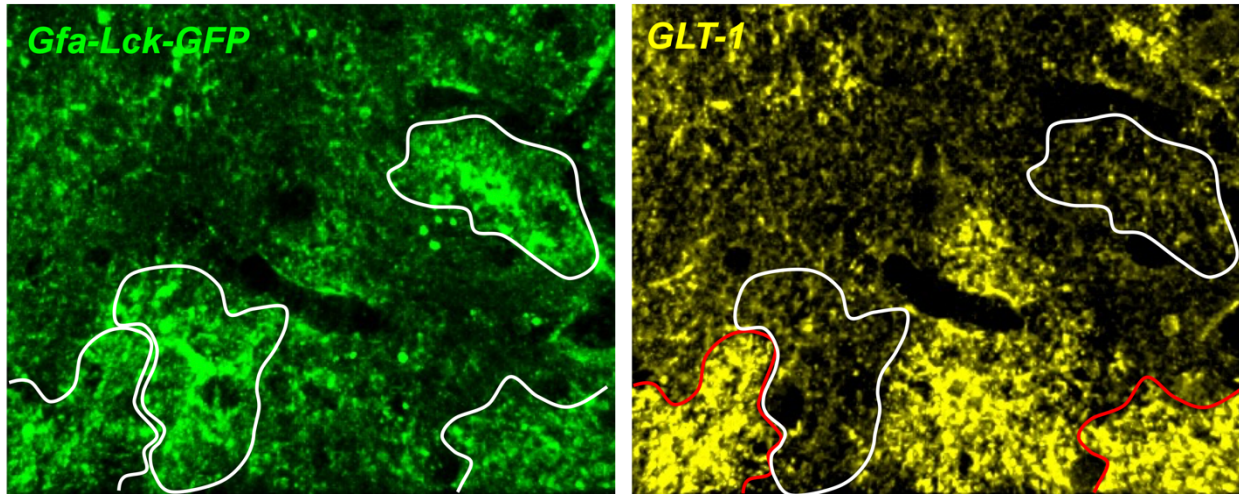

39

40 **Fig. S5.** Astroglial transduction with AAV5/GfaABC1D-Lck-GFAP labels the astroglial membrane  
41 (green). Astrocytes identified using this marker are outlined in white (left panel). (Right panel) In  
42 the same frame, immunolabeling for GLT-1 (yellow) shows astrocytes with high (red outline) and  
43 low levels of GLT-1 expression (white outline).

44

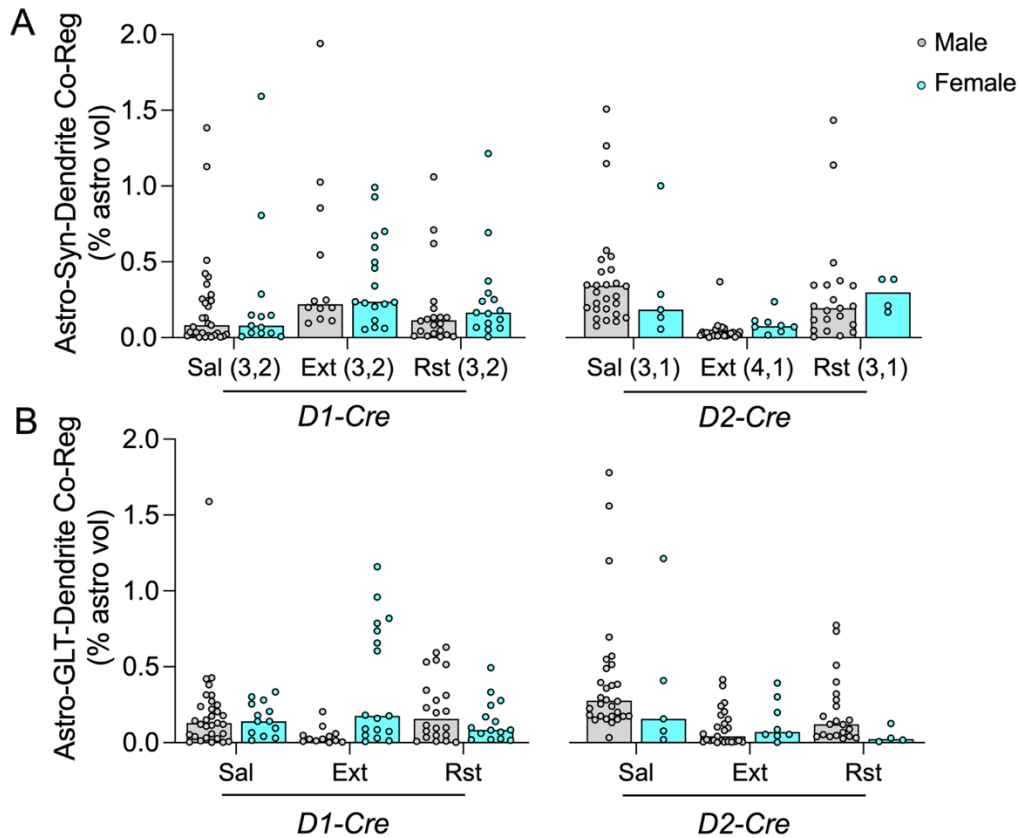

45

46 **Fig. S6. Cell-type specific dynamics in astrocyte-synapse and GLT-dendrite association**

47 **are not sex-dependent.** (A) No sex differences were detected in D1- or D2-synaptic co-

48 registration by NAc core astroglia after operant training with heroin (2-way ANOVA  $F_{1,196}=0.7529$

49  $p=0.3866$ ). (B) Dendritic association of GLT-1 did not differ by sex (2-way ANOVA  $F_{1,196}=0.05632$

50  $p=0.8127$ ). Sal, yoked saline; Ext, extinguished; Rst, 15-min cued reinstatement. Animal N shown

51 below bars in (A) as (male, female).

52

### Extinguished Heroin Seeking

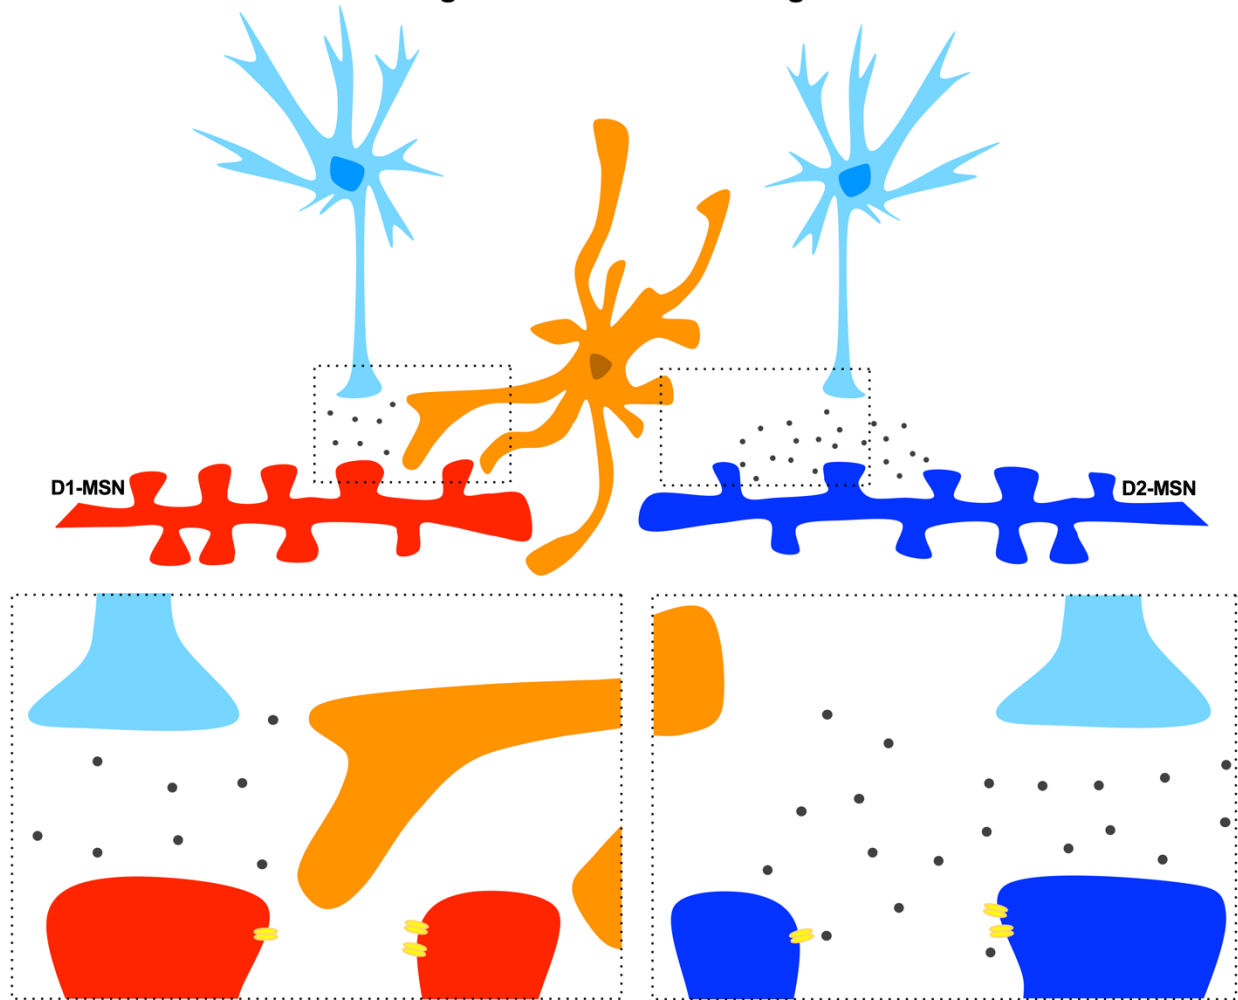

53

54 **Fig. S7. Synapse-selective proximity of astrocytes regulates seeking.** Extinguished heroin  
55 seeking is characterized by astrocytes exhibiting a high degree of association with synapses from  
56 D1-MSNs (left), but retraction from synapses from D2-MSNs (right). High synaptic co-registration  
57 by astroglial processes low in GLT-1 (orange) is predicted to induce autoinhibition through spatial  
58 buffering of glutamate toward presynaptic inhibitory autoreceptors (36). The high co-registration  
59 of astroglia with D1-MSN synapses during extinction training is also predicted to shield post-  
60 synaptic NR2B receptors (yellow) that produce postsynaptic potentiation when stimulated by  
61 glutamate (33). These two functions would suppress D1-MSN potentiation during extinction  
62 training. Instead, retraction from D2-MSNs after extinction of heroin seeking engages post-  
63 synaptic potentiation of D2-MSNs through stimulation of postsynaptic NR2B (33), synaptic



64 recruitment (41), and loss of autoinhibitory mechanisms at terminals synapsing onto D2-MSNs  
65 (36). These hypotheses are supported by data showing potentiation of D2-MSNs, but not D2-  
66 MSNs during extinction training (26, 46). Reversal of this pattern during cued reinstatement would  
67 permit potentiation of D1-MSNs and block signaling through D2-MSNs, permitting seeking  
68 behavior (10).  
69

| D1-Cre                            |                                   |                                   |                                   |                                   |                                   | D2-Cre                            |                                   |                                   |                                   |                                   |                                   |
|-----------------------------------|-----------------------------------|-----------------------------------|-----------------------------------|-----------------------------------|-----------------------------------|-----------------------------------|-----------------------------------|-----------------------------------|-----------------------------------|-----------------------------------|-----------------------------------|
| Saline                            |                                   | Extinguished                      |                                   | Reinstated                        |                                   | Saline                            |                                   | Extinguished                      |                                   | Reinstated                        |                                   |
| Astro-Syn-Dendrite Co-Reg (% vol) | Astro-GLT-Dendrite Co-Reg (% vol) | Astro-Syn-Dendrite Co-Reg (% vol) | Astro-GLT-Dendrite Co-Reg (% vol) | Astro-Syn-Dendrite Co-Reg (% vol) | Astro-GLT-Dendrite Co-Reg (% vol) | Astro-Syn-Dendrite Co-Reg (% vol) | Astro-GLT-Dendrite Co-Reg (% vol) | Astro-Syn-Dendrite Co-Reg (% vol) | Astro-GLT-Dendrite Co-Reg (% vol) | Astro-Syn-Dendrite Co-Reg (% vol) | Astro-GLT-Dendrite Co-Reg (% vol) |
| 0.0300                            | 0.0076                            | 0.7001                            | 0.7365                            | 0.1932                            | 0.2788                            | 0.1307                            | 0.2724                            | 0.0287                            | 0.3753                            | 0.1782                            | 0.1425                            |
| 0.2456                            | 0.1780                            | 0.0605                            | 0.1774                            | 0.1327                            | 0.5443                            | 0.1984                            | 0.3842                            | 0.0155                            | 0.1248                            | 0.1163                            | 0.7739                            |
| 0.5098                            | 0.2482                            | 0.3413                            | 1.1587                            | 0.1322                            | 0.0502                            | 0.1127                            | 0.1744                            | 0.0455                            | 0.2622                            | 0.3429                            | 0.3991                            |
| 0.0305                            | 0.0043                            | 0.6727                            | 0.7868                            | 0.0913                            | 0.2309                            | 0.3452                            | 0.4887                            | 0.3680                            | 0.0975                            | 0.3757                            | 0.1197                            |
| 0.2540                            | 0.2729                            | 0.2288                            | 0.6566                            | 0.1210                            | 0.0947                            | 0.2270                            | 0.1807                            | 0.0200                            | 0.1809                            | 0.2075                            | 0.3220                            |
| 0.0708                            | 0.0527                            | 0.2227                            | 0.9594                            | 0.1350                            | 0.5158                            | 0.2557                            | 0.2551                            | 0.0304                            | 0.2420                            | 1.4346                            | 0.7354                            |
| 0.0123                            | 0.0277                            | 0.0679                            | 0.8191                            | 0.6213                            | 0.3455                            | 0.3475                            | 0.2966                            | 0.0368                            | 0.0078                            | 0.0115                            | 0.5105                            |
| 0.0155                            | 0.0398                            | 0.5954                            | 0.6045                            | 0.7099                            | 0.6298                            | 0.1069                            | 0.0336                            | 0.0127                            | 0.1029                            | 0.0477                            | 0.0883                            |
| 0.0144                            | 0.0020                            | 1.0266                            | 0.1080                            | 0.0482                            | 0.3122                            | 0.3589                            | 0.1326                            | 0.0151                            | 0.0145                            | 0.3453                            | 0.2403                            |
| 0.2441                            | 0.1499                            | 0.1108                            | 0.0421                            | 0.0080                            | 0.0475                            | 0.0768                            | 0.1742                            | 0.0294                            | 0.2039                            | 1.1386                            | 0.1740                            |
| 0.2063                            | 0.1212                            | 1.9399                            | 0.0129                            | 2.4966                            | 0.5931                            | 0.1889                            | 0.2818                            | 0.0124                            | 0.4163                            | 0.4940                            | 0.0402                            |
| 0.0212                            | 0.0581                            | 0.1929                            | 0.2035                            | 0.0837                            | 0.1153                            | 1.5075                            | 2.9899                            | 0.0388                            | 0.1537                            | 0.0353                            | 0.0314                            |
| 0.1315                            | 0.1291                            | 0.2483                            | 0.0004                            | 0.0262                            | 0.0093                            | 5.6845                            | 1.5592                            | 0.0611                            | 0.0035                            | 0.3478                            | 0.0415                            |
| 0.0793                            | 0.0665                            | 0.1987                            | 0.0241                            | 0.0108                            | 0.0082                            | 2.0164                            | 0.2007                            | 0.0687                            | 0.0054                            | 0.1945                            | 0.2818                            |
| 0.1483                            | 0.1803                            | 0.1978                            | 0.0131                            | 0.0059                            | 0.0021                            | 0.3009                            | 0.1548                            | 0.0110                            | 0.0584                            | 0.0424                            | 0.1492                            |
| 0.0067                            | 0.0151                            | 0.2338                            | 0.1819                            | 0.0194                            | 0.0102                            | 1.1487                            | 0.3968                            | 0.0391                            | 0.0448                            | 0.0847                            | 0.0475                            |
| 0.0293                            | 0.0416                            | 0.1124                            | 0.1596                            | 0.0432                            | 0.0984                            | 0.4489                            | 0.5708                            | 0.0705                            | 0.0551                            | 0.2491                            | 0.0681                            |
| 0.1392                            | 0.1404                            | 0.9283                            | 0.0909                            | 0.0108                            | 0.0757                            | 0.3398                            | 0.1734                            | 0.1116                            | 0.3930                            | 0.2068                            | 0.0527                            |
| 0.0670                            | 0.0305                            | 0.0538                            | 0.0847                            | 0.1098                            | 0.1977                            | 0.5152                            | 1.1983                            | 0.0172                            | 0.0019                            | 0.1428                            | 0.0393                            |
| 0.4016                            | 0.2204                            | 0.2374                            | 0.0477                            | 3.9462                            | 0.2067                            | 0.2718                            | 0.3590                            | 0.0710                            | 0.1988                            | 0.1213                            | 0.1213                            |
| 0.2838                            | 0.4279                            | 0.9920                            | 0.0307                            | 0.2386                            | 0.0353                            | 0.2250                            | 0.1535                            | 0.1009                            | 0.0544                            | 0.0052                            | 0.0276                            |
| 1.1285                            | 0.3126                            | 0.4975                            | 0.0118                            | 1.0601                            | 0.5309                            | 1.2654                            | 0.5146                            | 0.2368                            | 0.0877                            | 0.3853                            | 0.0165                            |
| 0.3527                            | 0.2036                            | 0.2042                            | 0.0075                            | 0.0956                            | 0.1388                            | 2.2984                            | 1.7794                            | 0.0798                            | 0.3014                            | 0.3851                            | 0.1269                            |
| 0.0352                            | 0.1150                            | 0.4574                            | 0.0740                            | 0.3731                            | 0.2772                            | 0.5759                            | 0.1510                            | 0.0544                            | 0.0044                            | 0.1684                            | 0.0301                            |
| 0.0048                            | 0.1748                            | 0.5457                            | 0.0033                            | 0.2509                            | 0.2463                            | 0.1536                            | 0.5491                            | 0.0236                            | 0.0132                            | 0.2111                            | 0.0072                            |
| 0.0941                            | 0.3145                            | 0.2411                            | 0.0600                            | 0.2393                            | 0.0616                            | 0.1875                            | 0.2406                            | 0.0797                            | 0.0416                            |                                   |                                   |
| 0.2877                            | 0.2814                            | 0.1222                            | 0.0089                            | 0.1581                            | 0.0183                            | 0.3488                            | 0.2252                            | 0.0117                            | 0.0136                            |                                   |                                   |
| 0.0284                            | 0.2051                            | 0.8550                            | 0.0477                            | 0.0052                            | 0.0247                            | 0.4335                            | 0.3767                            | 0.0328                            | 0.0070                            |                                   |                                   |
| 1.5922                            | 0.3352                            | 0.0949                            | 0.0229                            | 0.6927                            | 0.4945                            | 0.5357                            | 0.6957                            | 0.0184                            | 0.0157                            |                                   |                                   |
| 0.8063                            | 0.2548                            |                                   |                                   | 0.1775                            | 0.1694                            | 0.1224                            | 0.1730                            | 0.0357                            | 0.0801                            |                                   |                                   |
| 0.1473                            | 0.3016                            |                                   |                                   | 1.2145                            | 0.3333                            | 0.2860                            | 1.2131                            | 0.0293                            | 0.0202                            |                                   |                                   |
| 0.0076                            | 0.0951                            |                                   |                                   | 0.0673                            | 0.0841                            | 0.1845                            | 0.4097                            | 0.0047                            | 0.0005                            |                                   |                                   |
| 0.0311                            | 0.1405                            |                                   |                                   | 0.1652                            | 0.0209                            | 0.0565                            | 0.0780                            | 0.0023                            | 0.0039                            |                                   |                                   |
| 0.4217                            | 1.5885                            |                                   |                                   | 0.0536                            | 0.0818                            | 0.1340                            | 0.0199                            |                                   |                                   |                                   |                                   |
| 1.3833                            | 0.3813                            |                                   |                                   | 0.1204                            | 0.0696                            | 1.0013                            | 0.1578                            |                                   |                                   |                                   |                                   |
| 0.2289                            | 0.4215                            |                                   |                                   | 0.0628                            | 0.0153                            |                                   |                                   |                                   |                                   |                                   |                                   |
| 0.1299                            | 0.1208                            |                                   |                                   | 0.2941                            | 0.0977                            |                                   |                                   |                                   |                                   |                                   |                                   |
| 0.0039                            | 0.1085                            |                                   |                                   |                                   |                                   |                                   |                                   |                                   |                                   |                                   |                                   |
| 0.0373                            | 0.1434                            |                                   |                                   |                                   |                                   |                                   |                                   |                                   |                                   |                                   |                                   |
| 0.0312                            | 0.0317                            |                                   |                                   |                                   |                                   |                                   |                                   |                                   |                                   |                                   |                                   |
| 0.0822                            | 0.2388                            |                                   |                                   |                                   |                                   |                                   |                                   |                                   |                                   |                                   |                                   |
| 0.0097                            | 0.0025                            |                                   |                                   |                                   |                                   |                                   |                                   |                                   |                                   |                                   |                                   |
| 0.0040                            | 0.0594                            |                                   |                                   |                                   |                                   |                                   |                                   |                                   |                                   |                                   |                                   |
| 0.0021                            | 0.0123                            |                                   |                                   |                                   |                                   |                                   |                                   |                                   |                                   |                                   |                                   |

70

71 **Table S1. Dendrite-specific co-registration values.** Triple co-registration of astroglia with  
 72 Synapsin I and labeled dendrites, as well as triple co-registration of astroglia with GLT-1 and  
 73 labeled dendrites from D1- and D2-Cre rats are presented as % astrocyte volume.

74
